# Supplementary material for: Self-assembling PEGylated mannolipids for liposomal drug encapsulation of natural products
Source: Royal Society of Chemistry journal article supplement (doi:10.1039/d4ma01007h), 2024-12-06

## Supplementary Information

### Self-Assembling PEGylated Mannolipids for Liposomal Drug Encapsulation of Natural Products

### Self-Assembling PEGylated Mannolipids for Liposomal Drug Encapsulation of Natural Products

Leila Mousavifar,<sup>a,†</sup> Mukul R. Gupta,<sup>a,†</sup> Madleen Rivat,<sup>a</sup> Aly El Riz,<sup>a</sup> Abdelkrim Azzouz,<sup>a</sup> Jordan D. Lewicky,<sup>b</sup> Alexandrine L. Martel,<sup>b</sup> Hoang-Thanh Le,<sup>b,c,d</sup> René Roy<sup>a,\*</sup>

<sup>a</sup> *Glycosciences and Nanomaterial Laboratory, Université du Québec à Montréal, P.O. Box 8888, Succ. Centre-Ville, Montréal, Québec, Canada, H3C 3P8*

<sup>b</sup> *Health Sciences North Research Institute, 56 Walford Road, Sudbury, ON, Canada, P3E 2H2*

<sup>c</sup> *Medicinal Sciences Division, NOSM University, 935 Ramsey Lake Road, Sudbury, ON P3E 2C6, Canada.*

<sup>d</sup> *School of Natural Sciences, Laurentian University, 935 Ramsey Lake Road, Sudbury, ON P3E 2C6, Canada.*

<sup>†</sup> These authors contributed equally.

#### TABLE OF CONTENTS

**NMR Spectra of synthesized compounds:.....2-17**

**Critical Micelle Concentration (CMC):.....18-20**

## NMR Spectra of synthesized compounds:

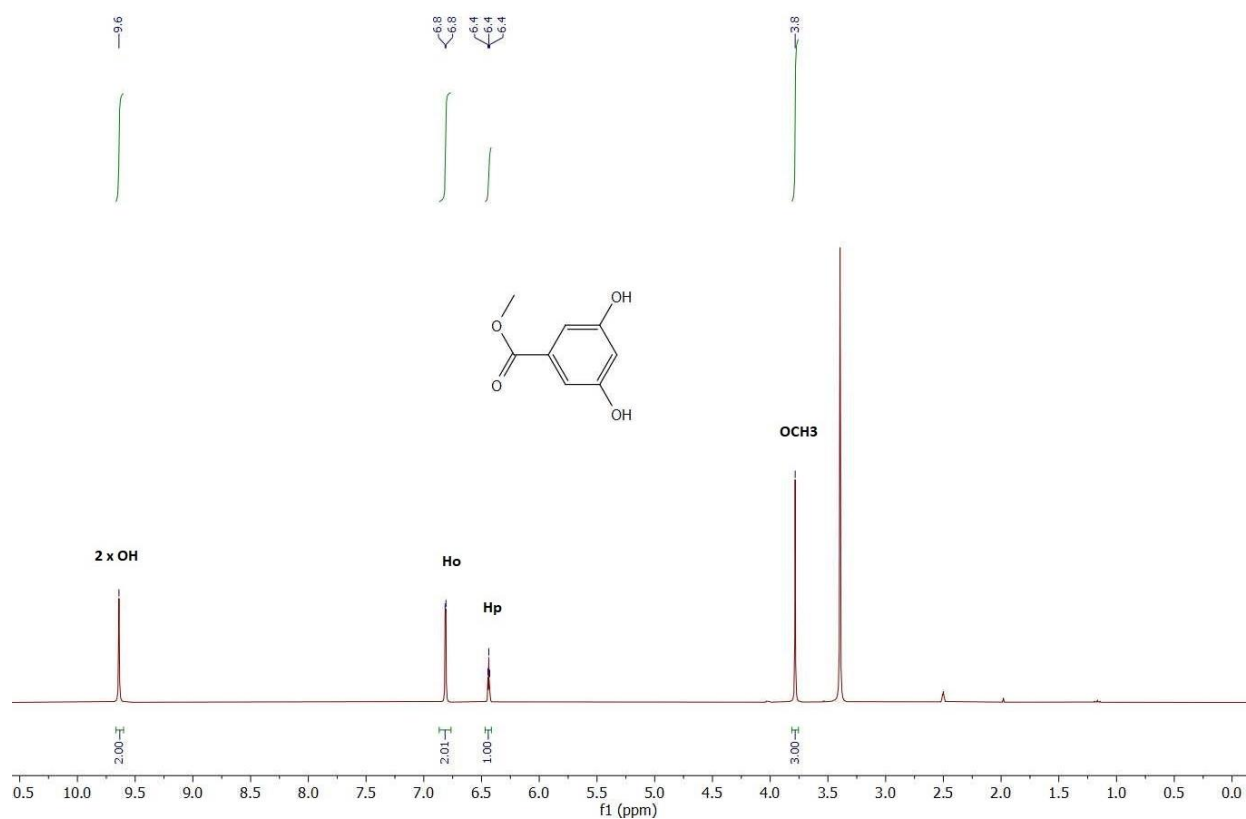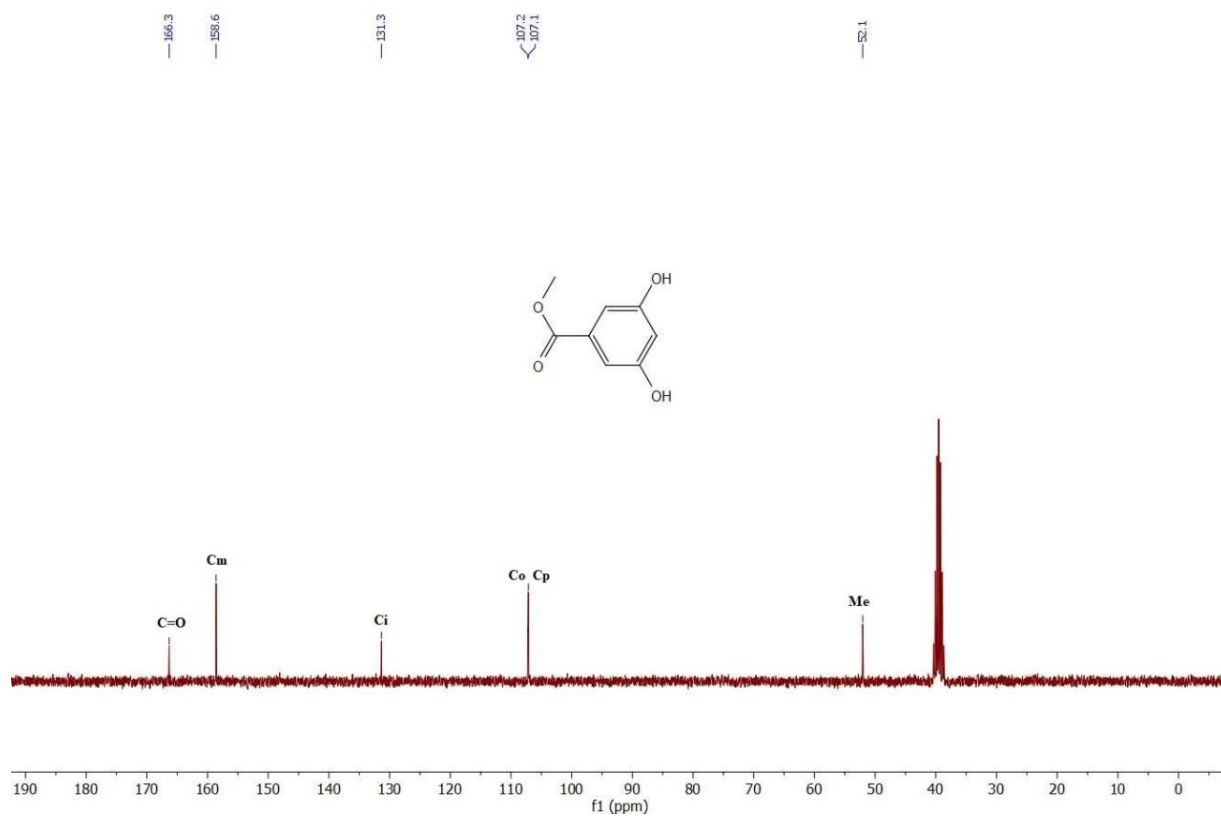

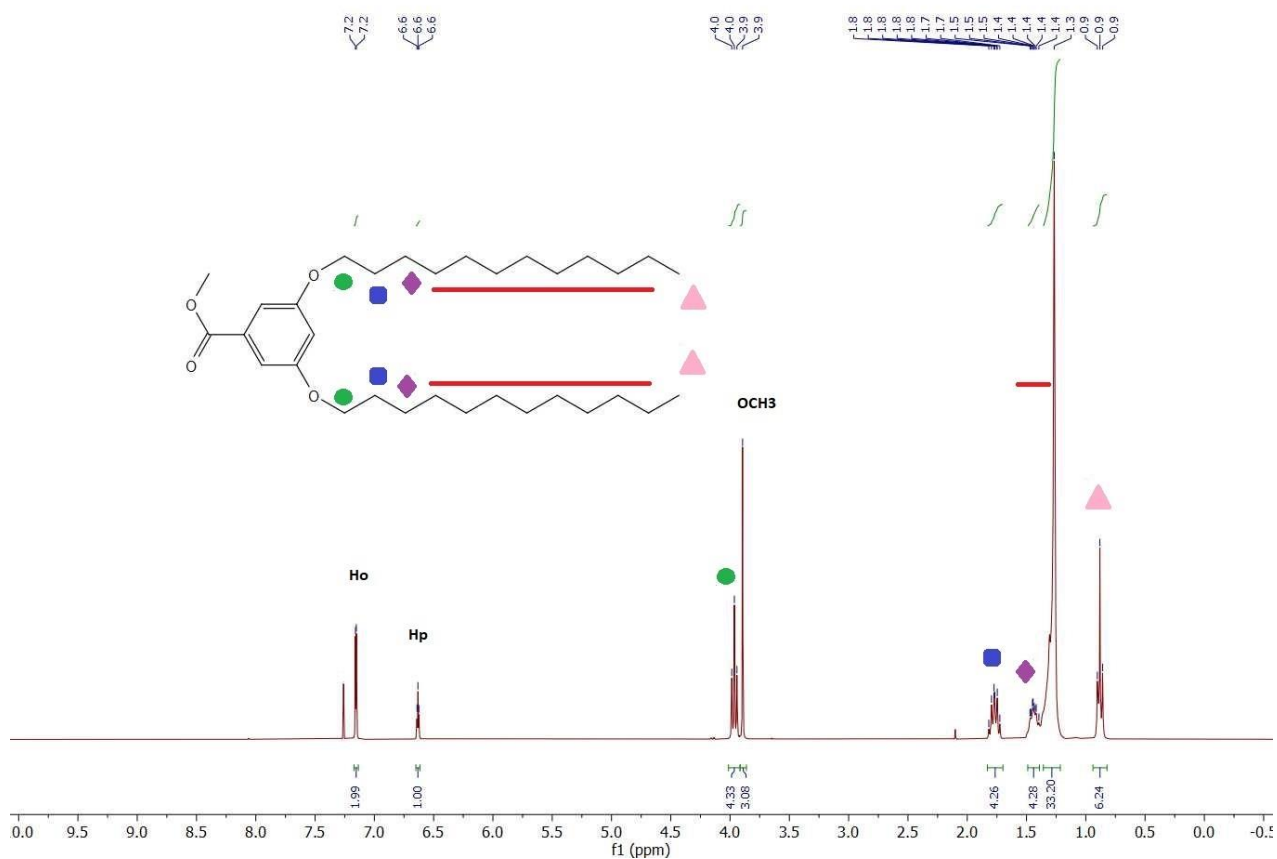

Figure 3. <sup>1</sup>H NMR (300 MHz, CDCl<sub>3</sub>) of compound 3

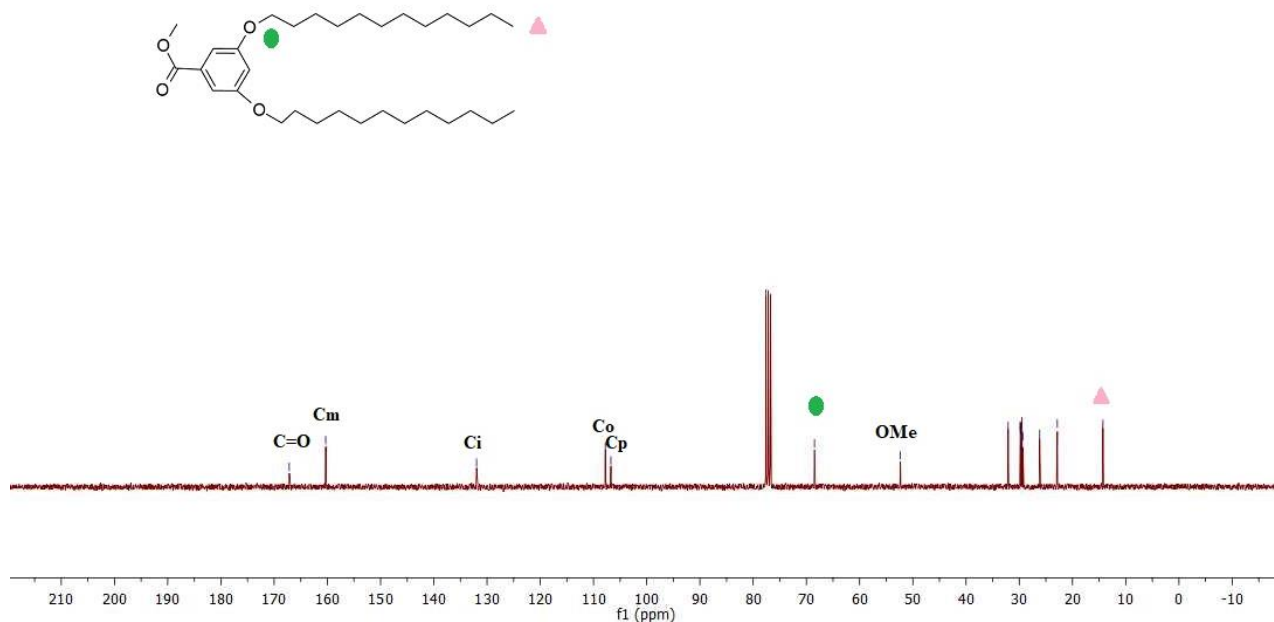

Figure 4. <sup>13</sup>C-NMR (75 MHz, DMSO-d<sub>6</sub>) of compound 3

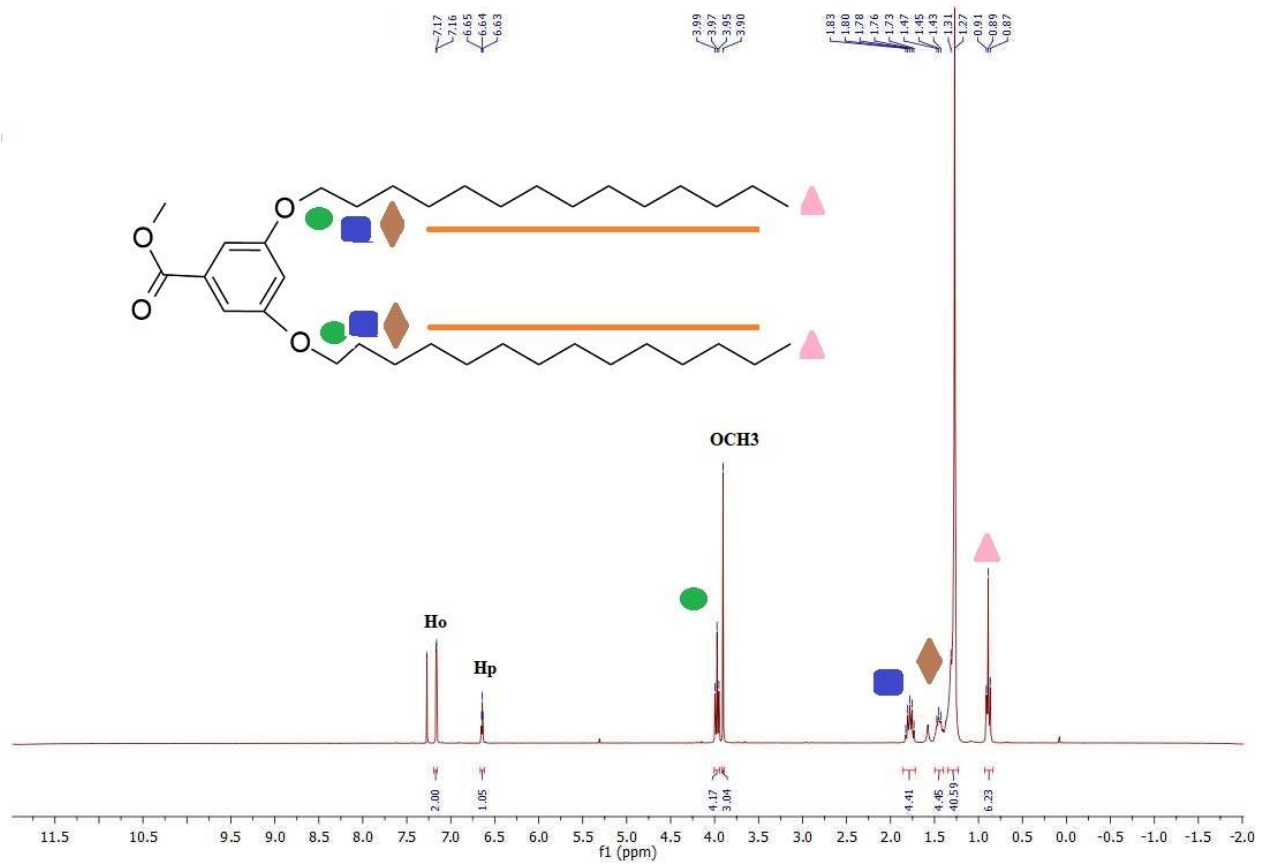

**Figure 5.  $^1\text{H}$  NMR (300 MHz,  $\text{CDCl}_3$ ) of compound 4**

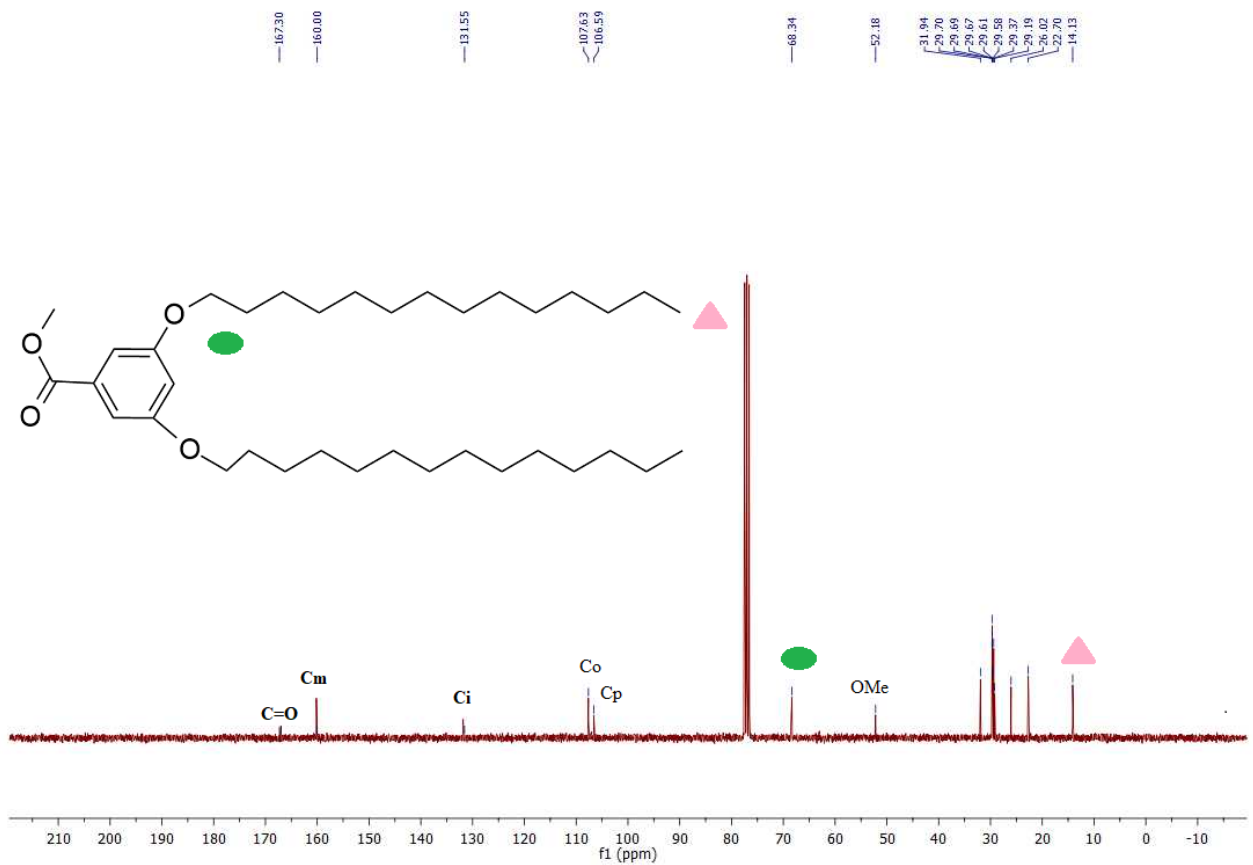

**Figure 6.  $^{13}\text{C}$ -NMR (300 MHz,  $\text{CDCl}_3$ ) of compound 4**

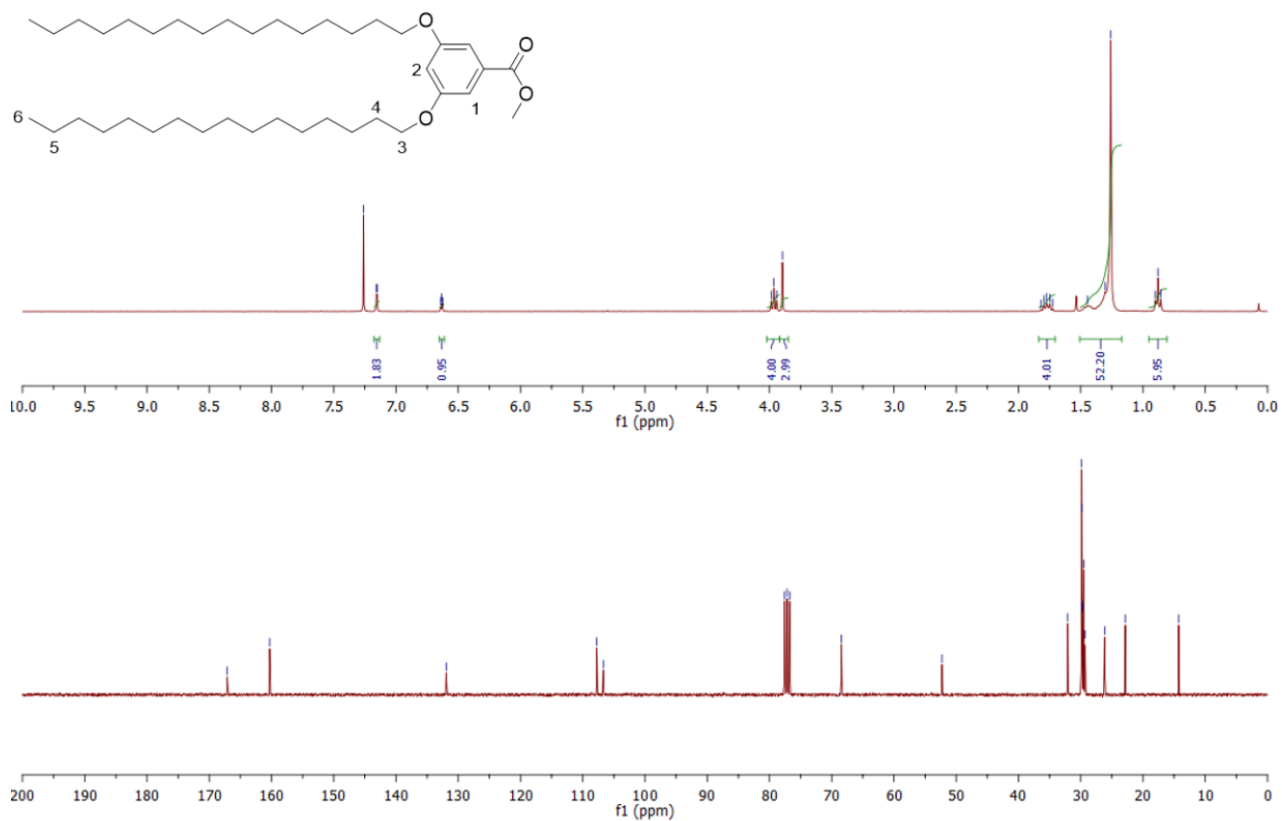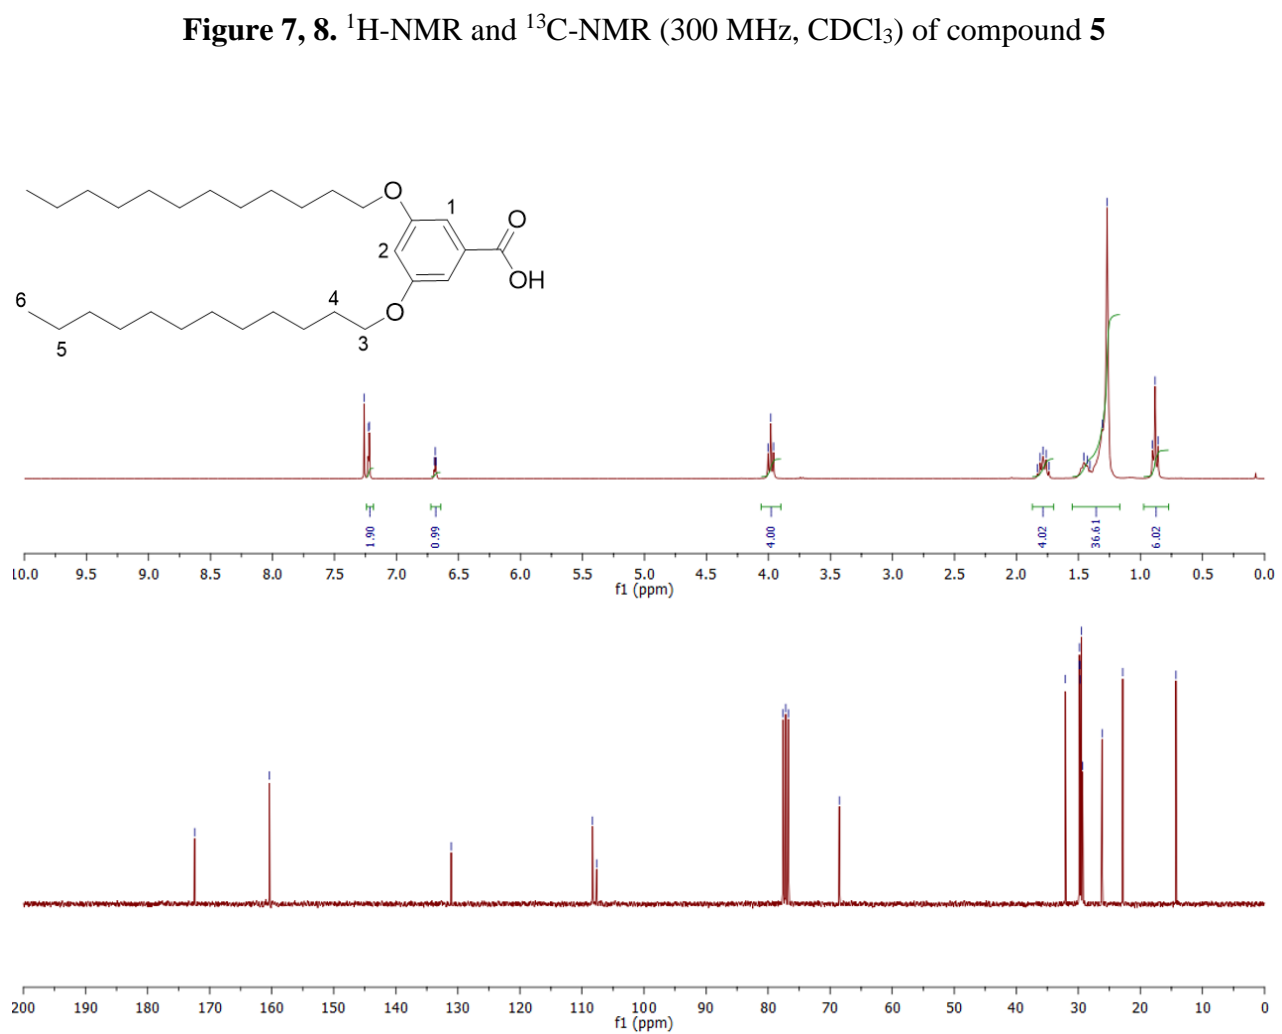

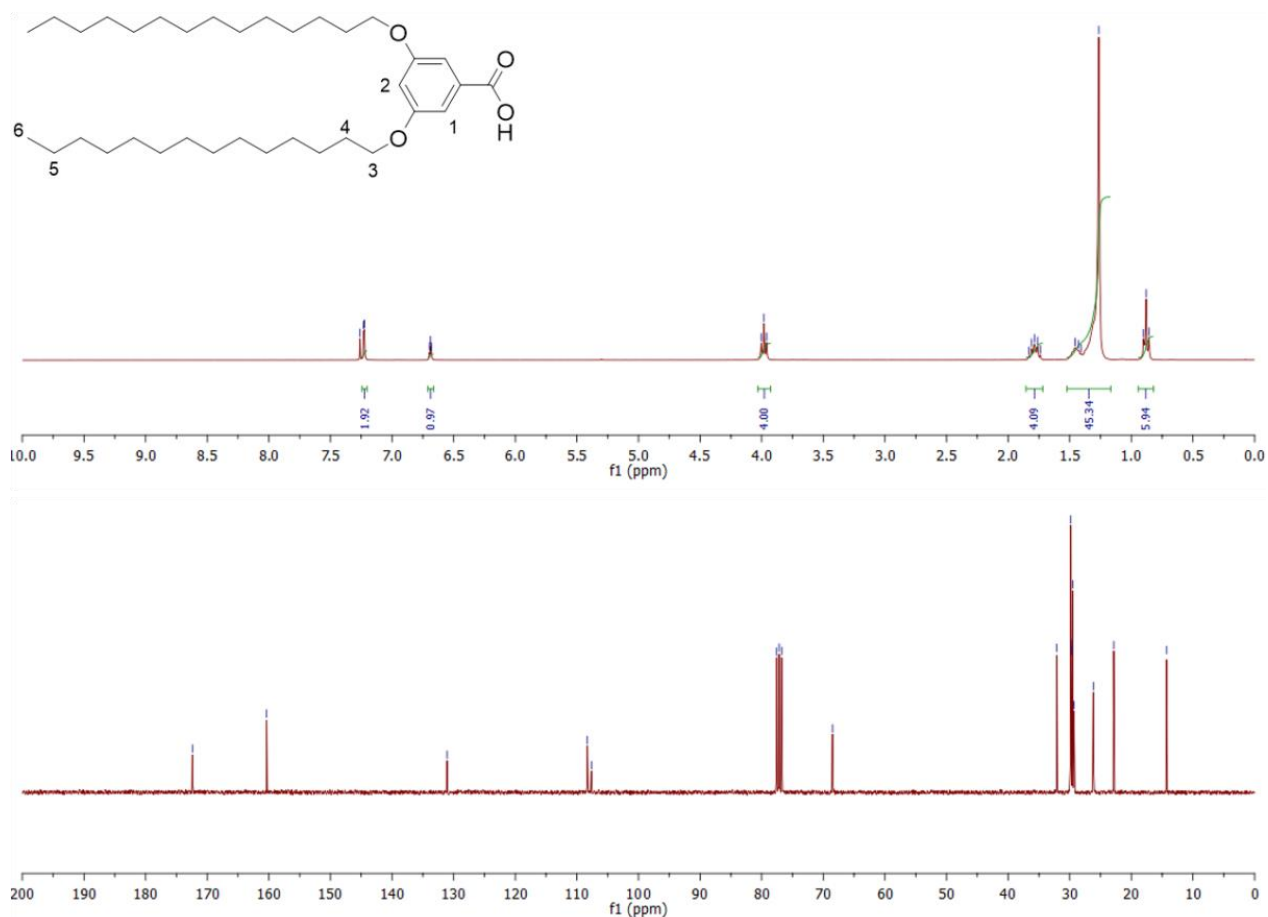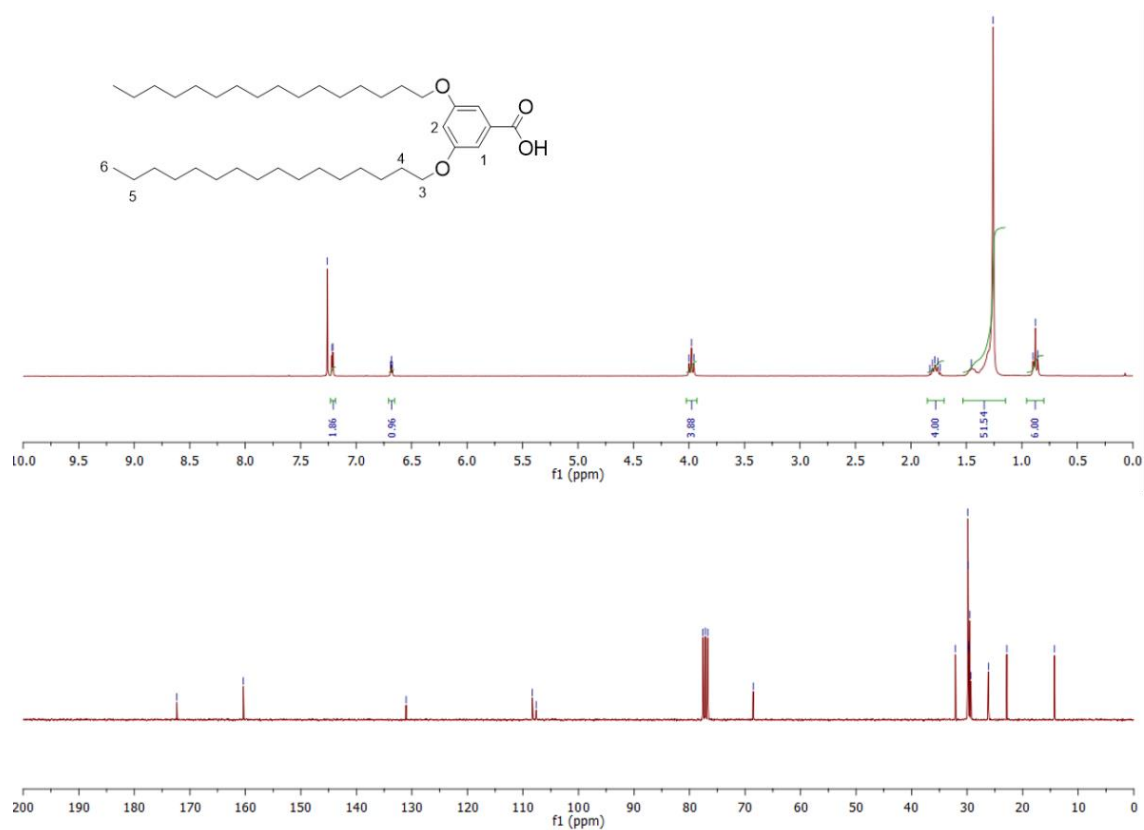

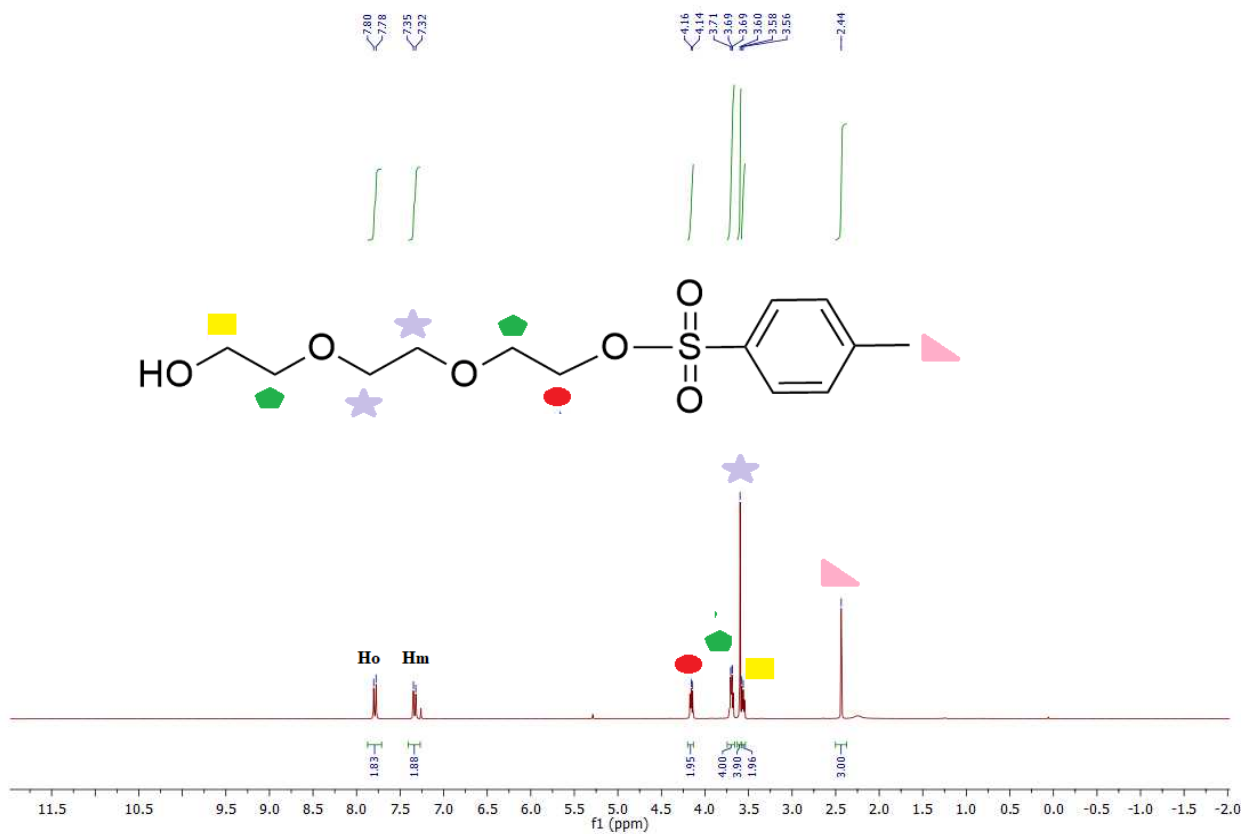

Figure 15.  $^1\text{H-NMR}$  (300 MHz,  $\text{CDCl}_3$ ) of compound 10

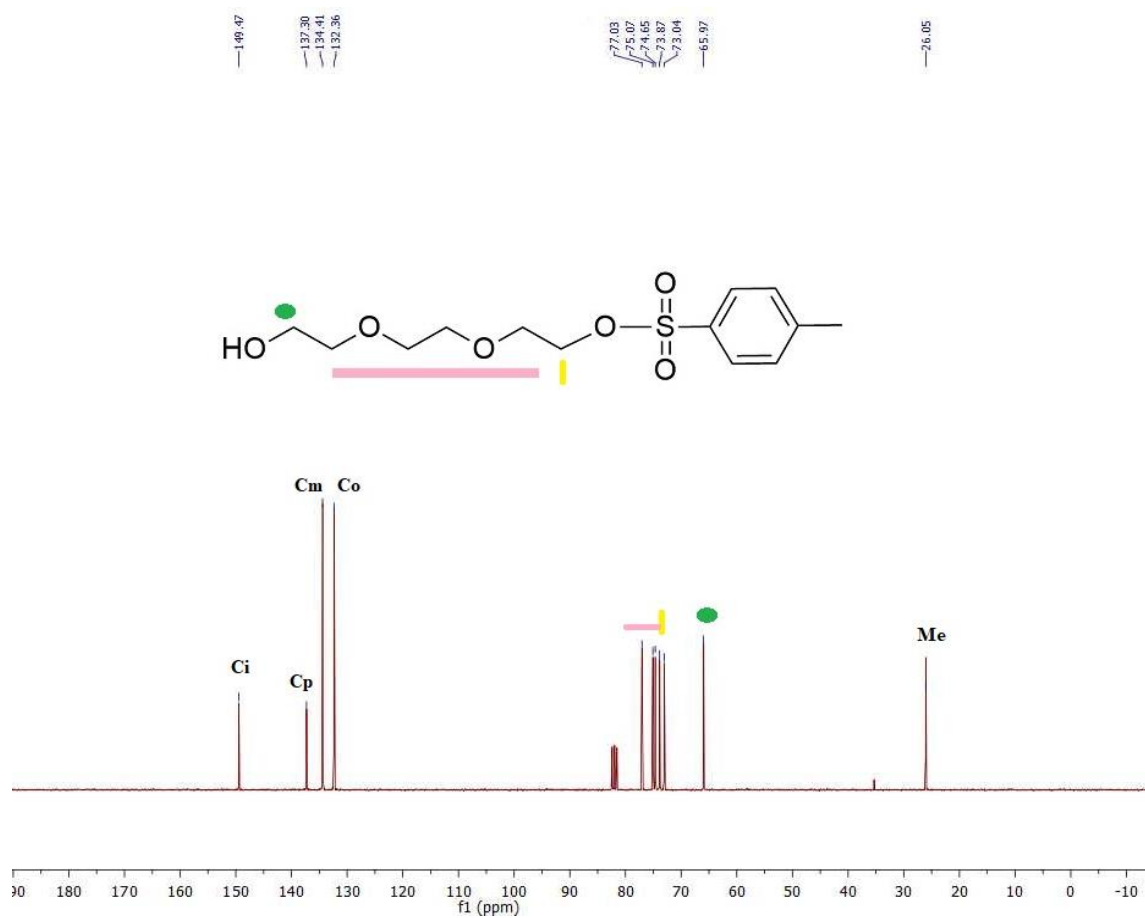

Figure 16.  $^{13}\text{C-NMR}$  (300 MHz,  $\text{CDCl}_3$ ) of compound 10

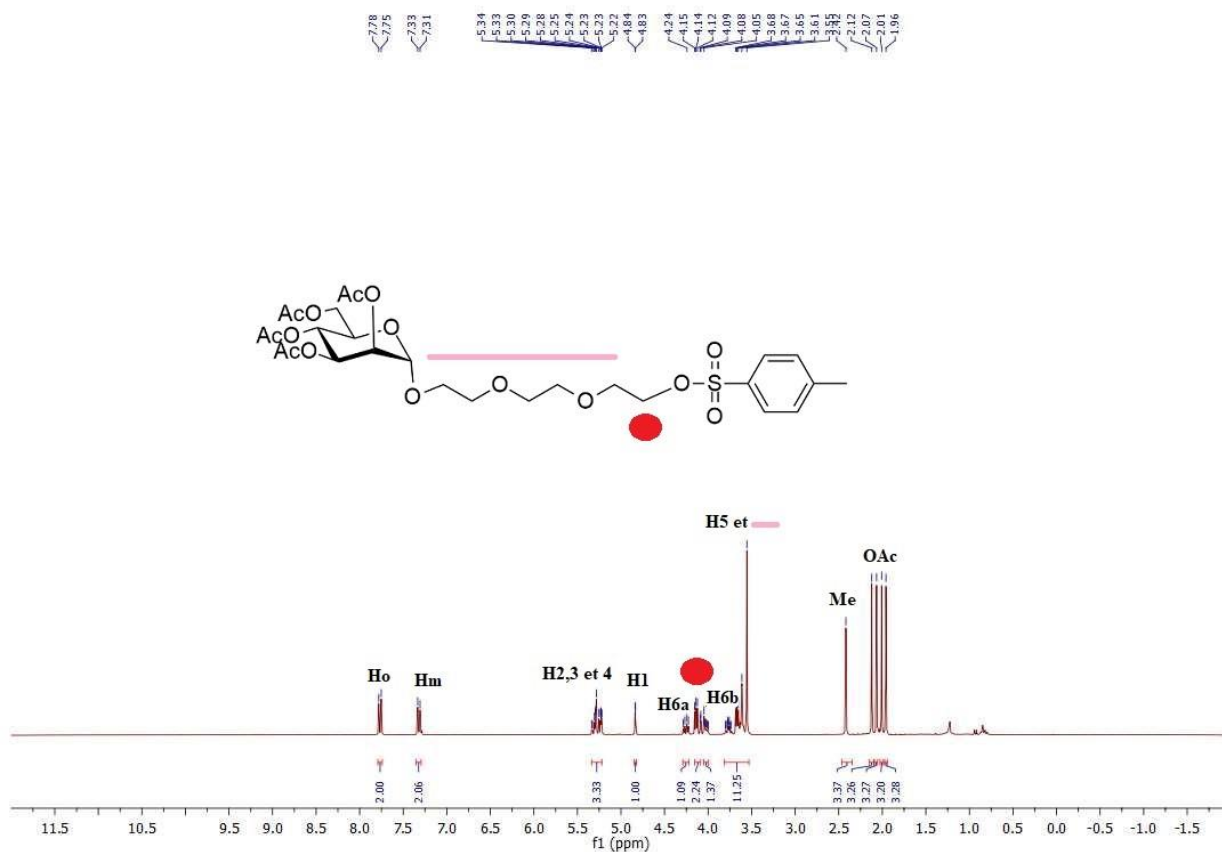

**Figure 17.  $^1\text{H-NMR}$  (300 MHz,  $\text{CDCl}_3$ ) of compound 12**

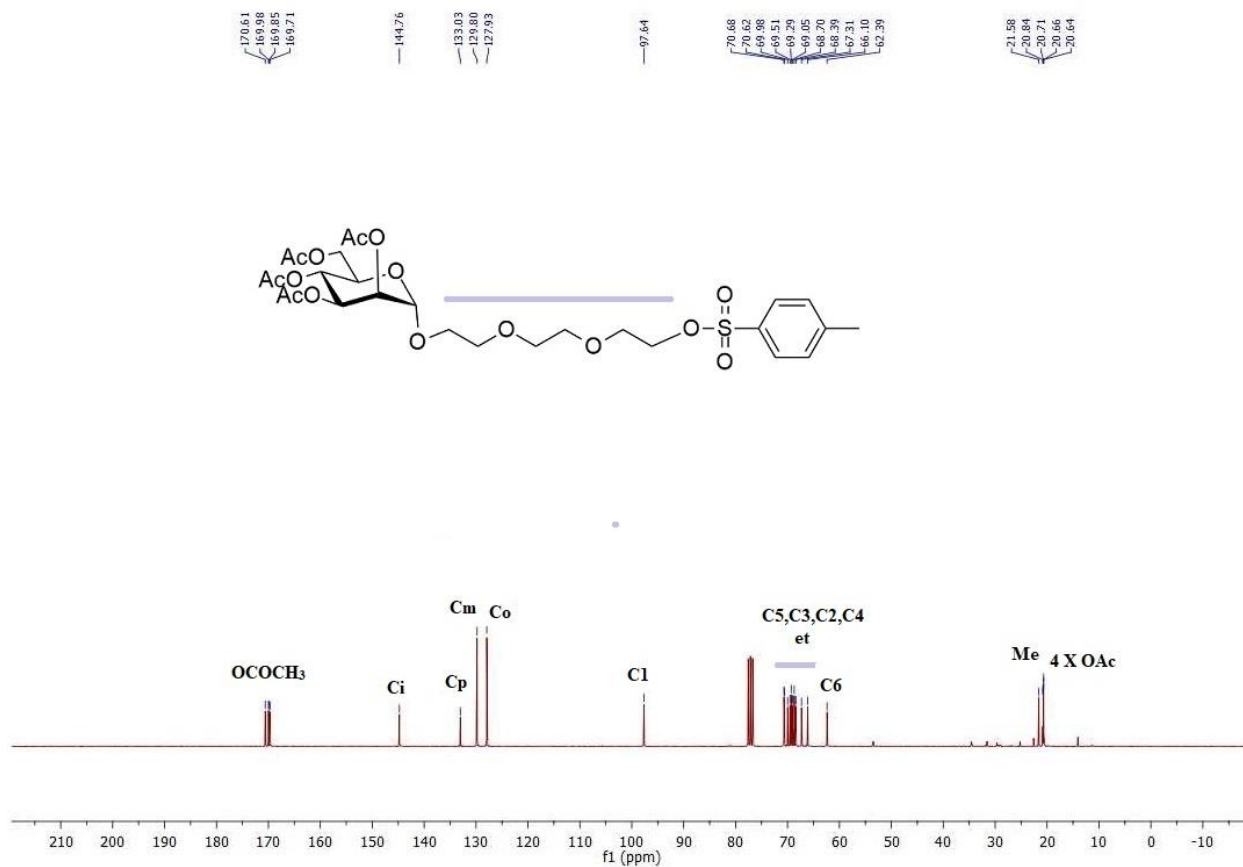

**Figure 18.  $^{13}\text{C-NMR}$  (300 MHz,  $\text{CDCl}_3$ ) of compound 12**



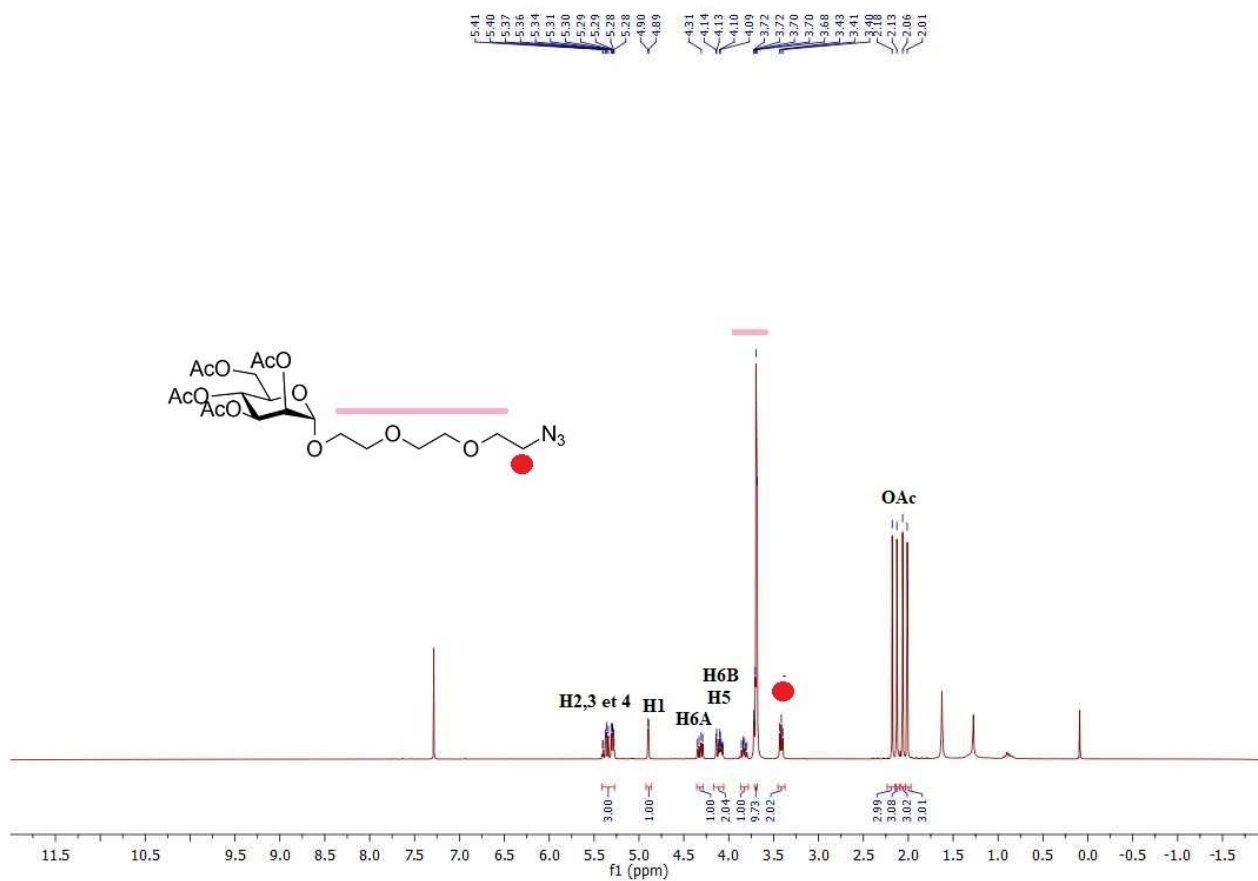

Figure 19. <sup>1</sup>H-NMR (300 MHz, CDCl<sub>3</sub>) of compound 13

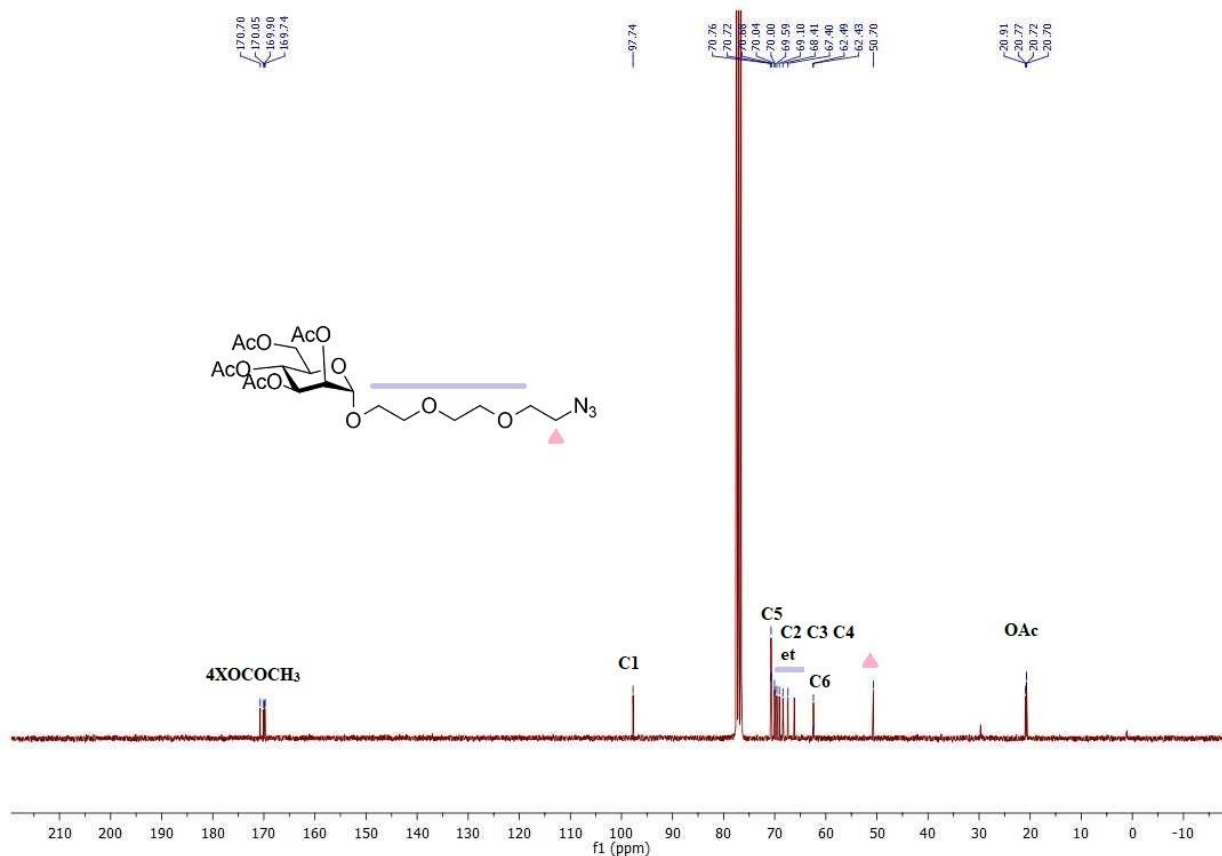

Figure 20. <sup>13</sup>C-NMR (300 MHz, CDCl<sub>3</sub>) of compound 13

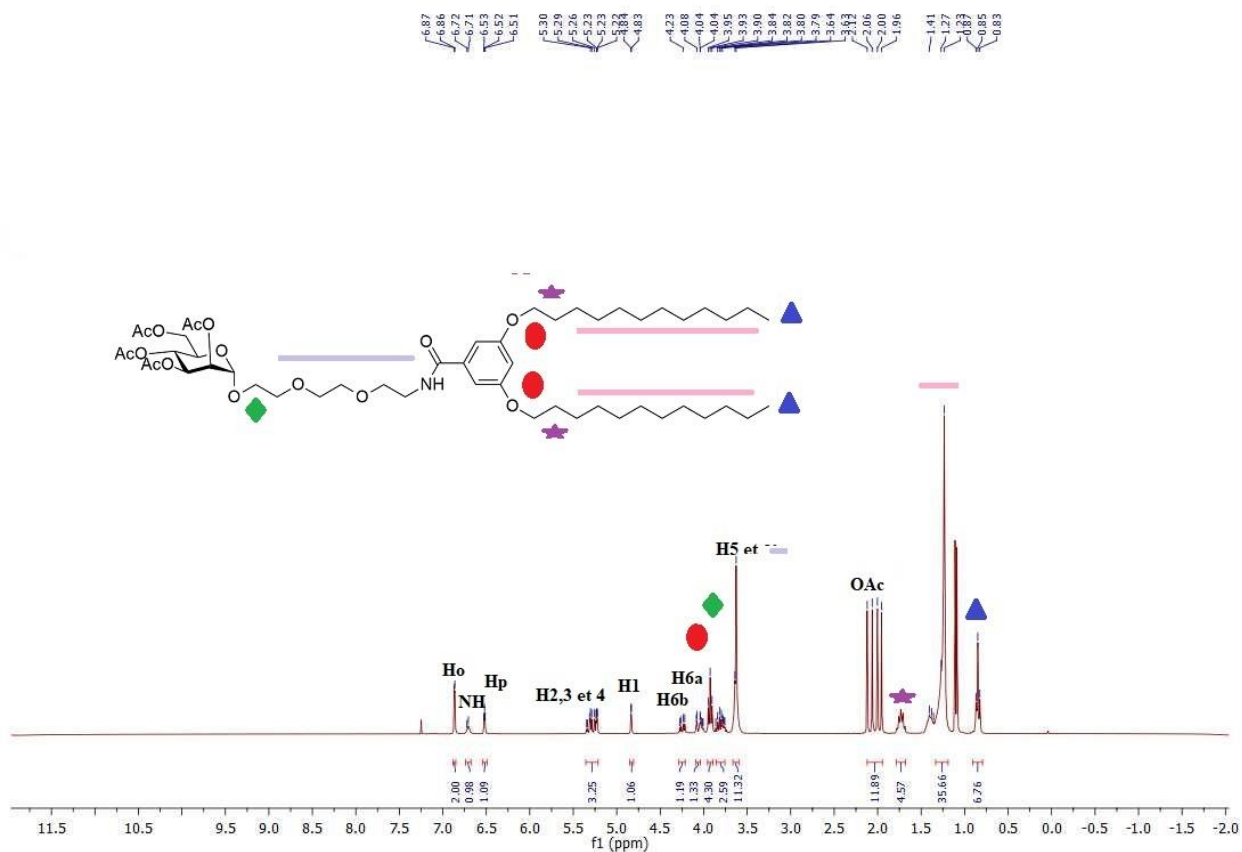

Figure 21.  $^1\text{H-NMR}$  (300 MHz,  $\text{CDCl}_3$ ) of compound 14

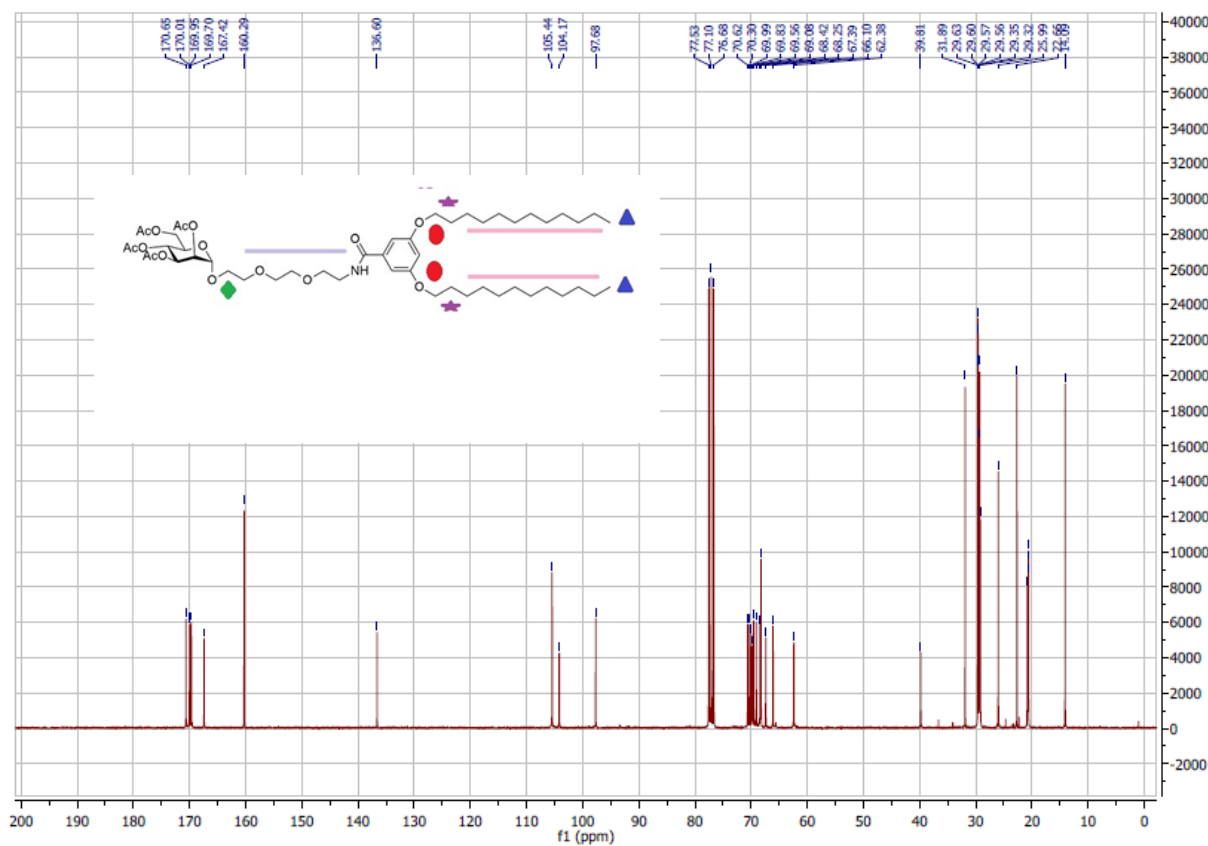

Figure 22.  $^{13}\text{C-NMR}$  (75 MHz,  $\text{CDCl}_3$ ) of compound 14

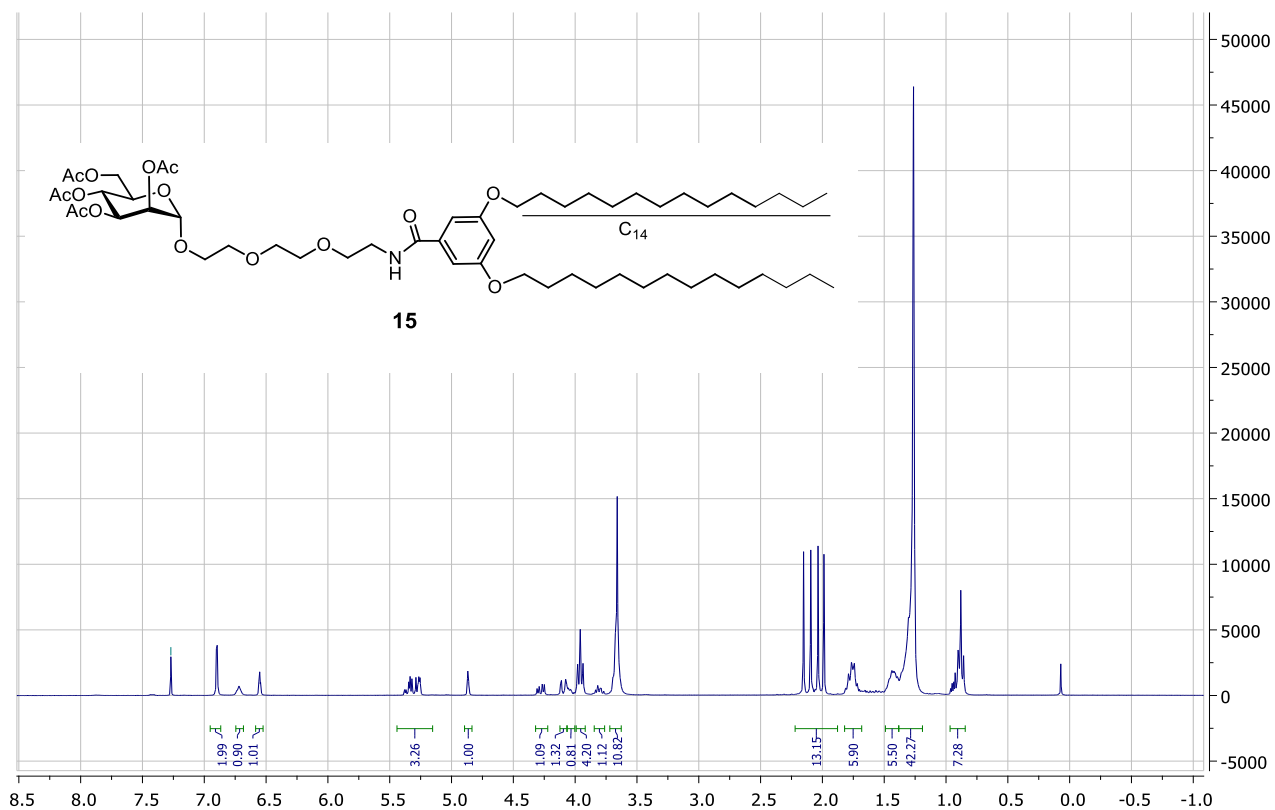

**Figure 23.**  $^1\text{H-NMR}$  (600 MHz,  $\text{CDCl}_3$ ) of compound **15**

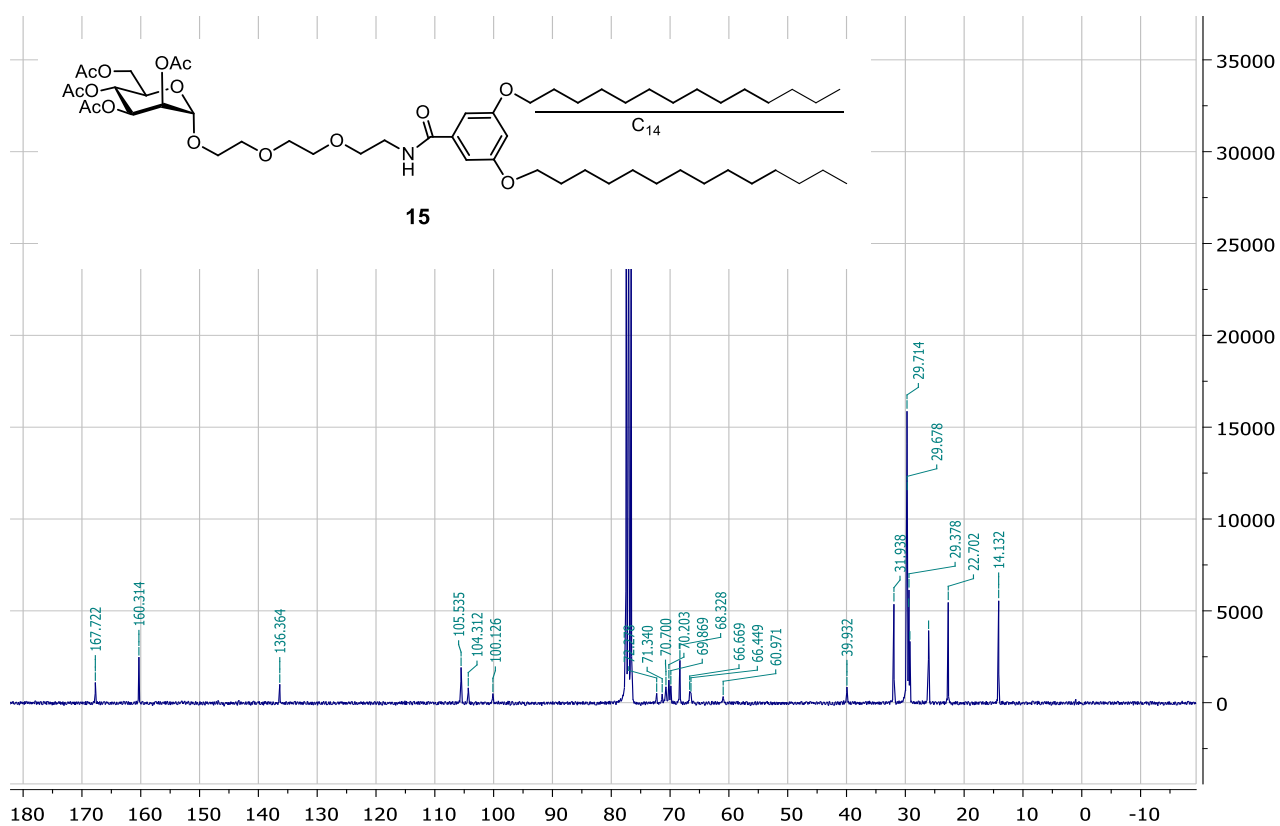

**Figure 24.**  $^{13}\text{C-NMR}$  (75 MHz,  $\text{CDCl}_3$ ) of compound **15**

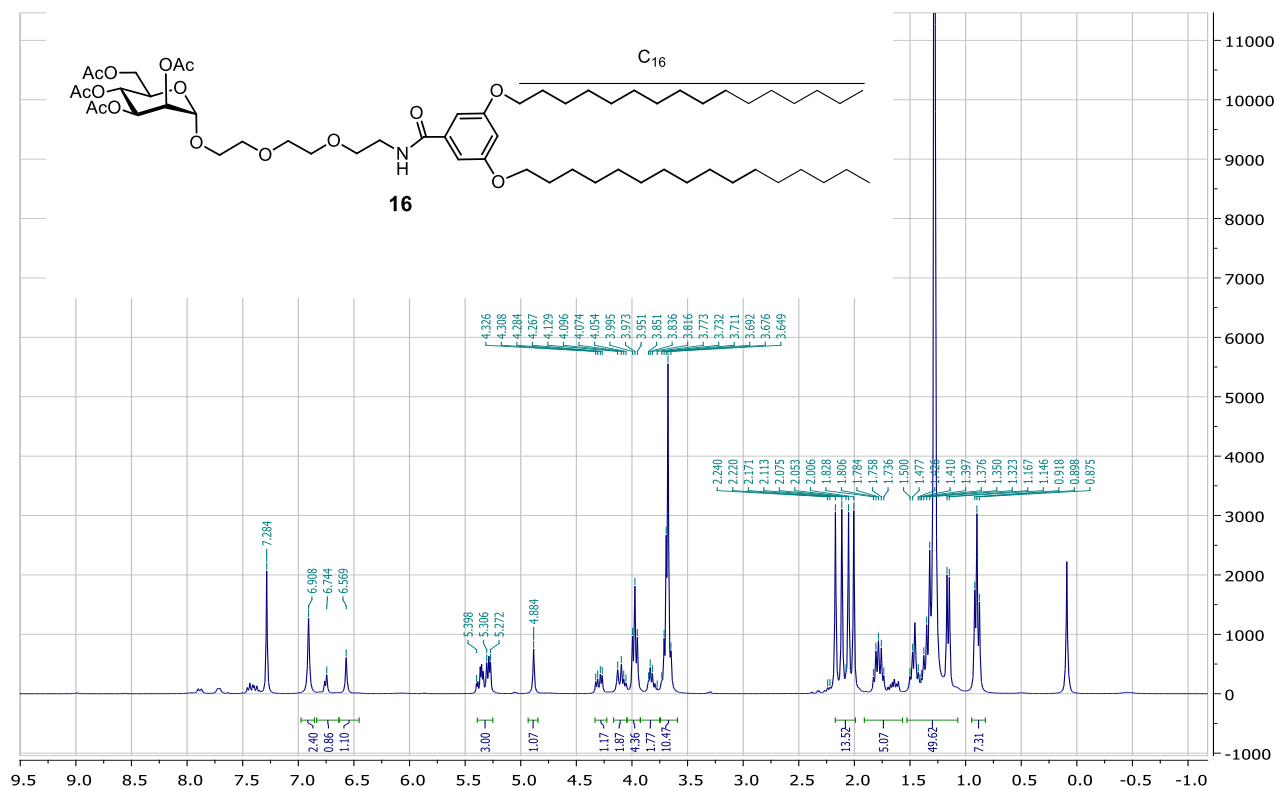

**Figure 25. <sup>1</sup>H NMR (600 MHz, CDCl<sub>3</sub>) of compound 16**

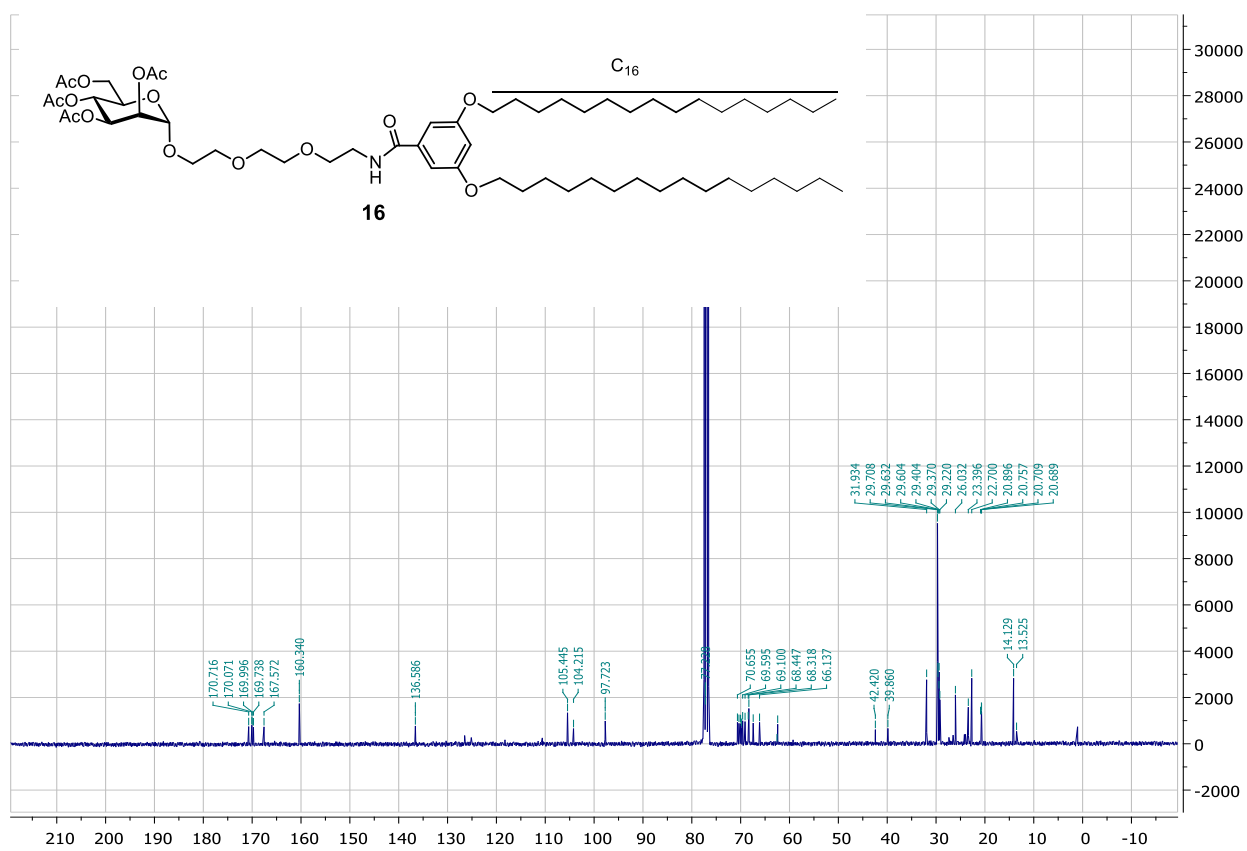

**Figure 26. <sup>13</sup>C-NMR (75 MHz, CDCl<sub>3</sub>) of compound 16**

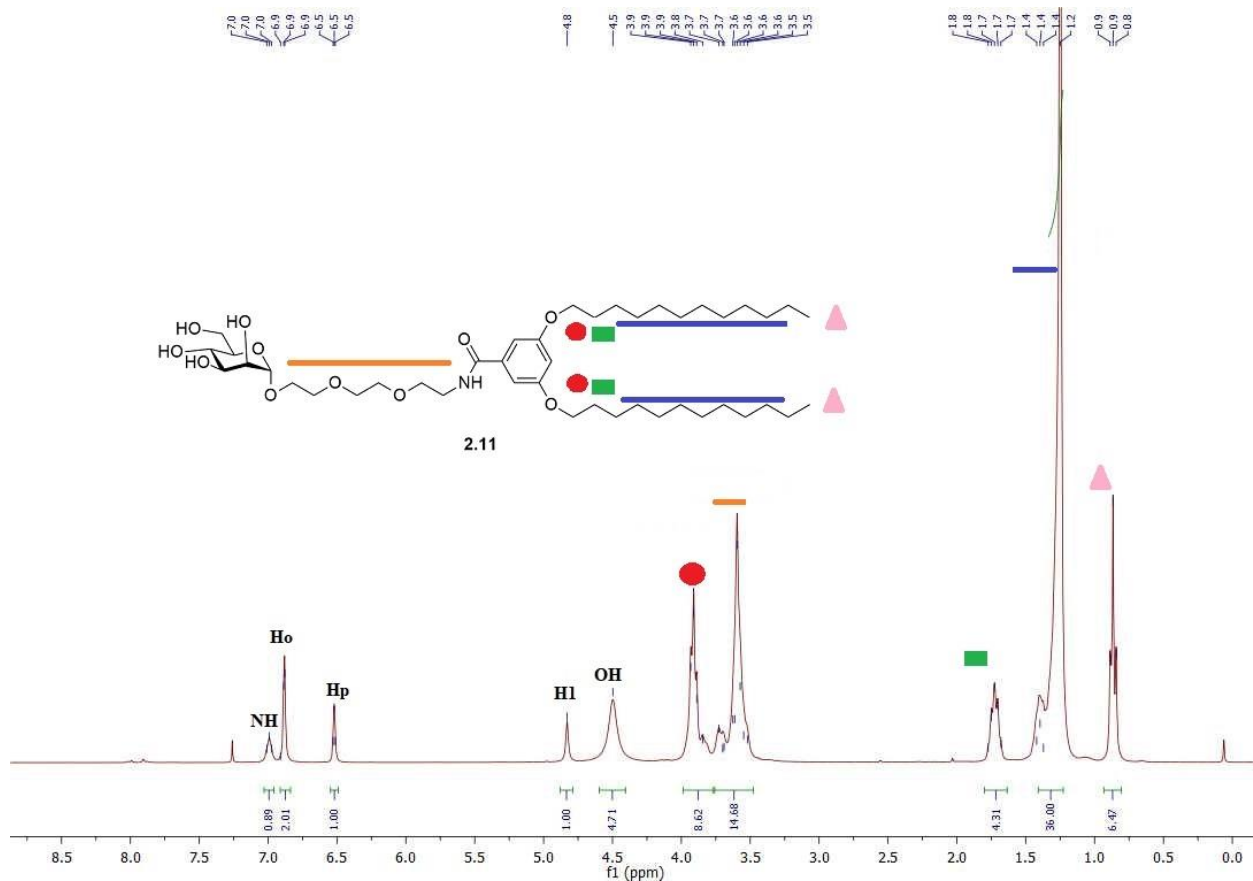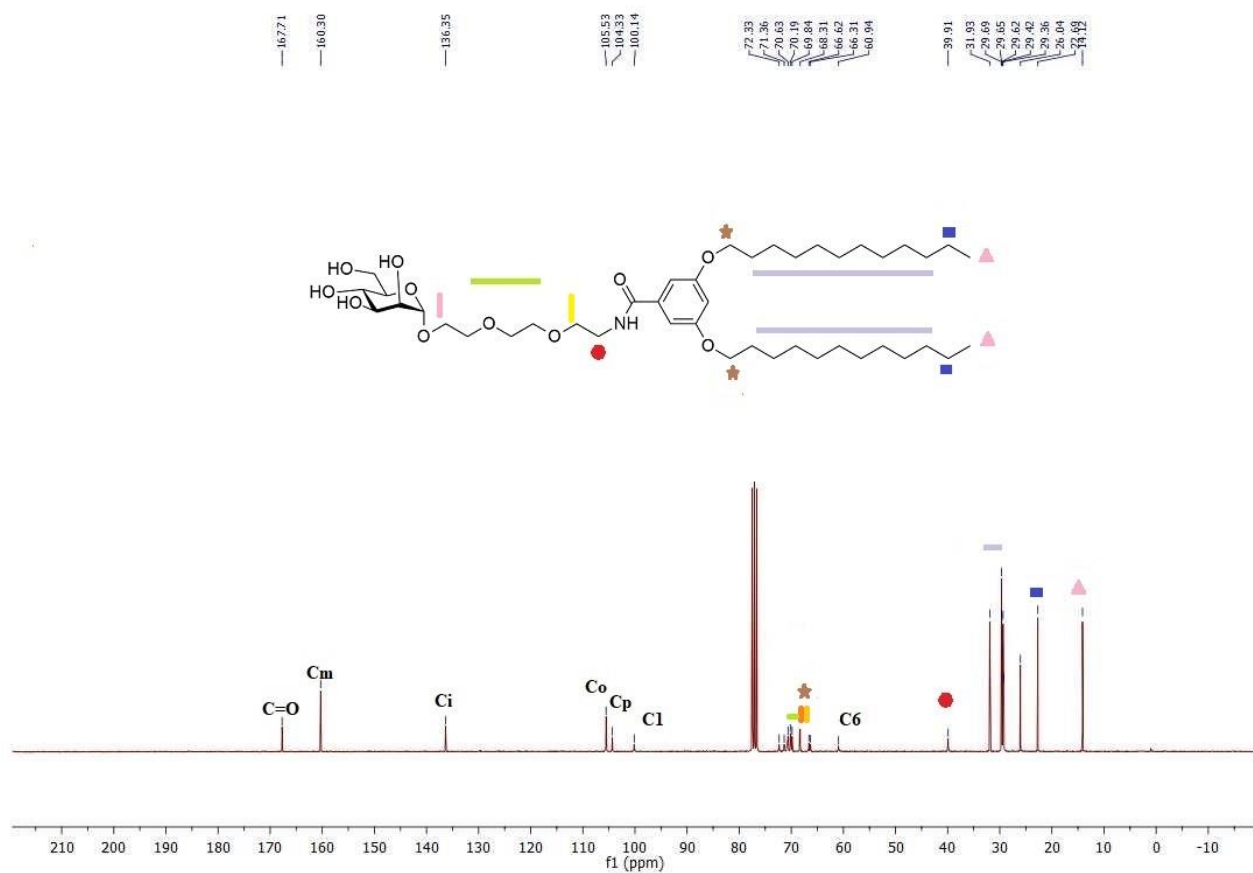

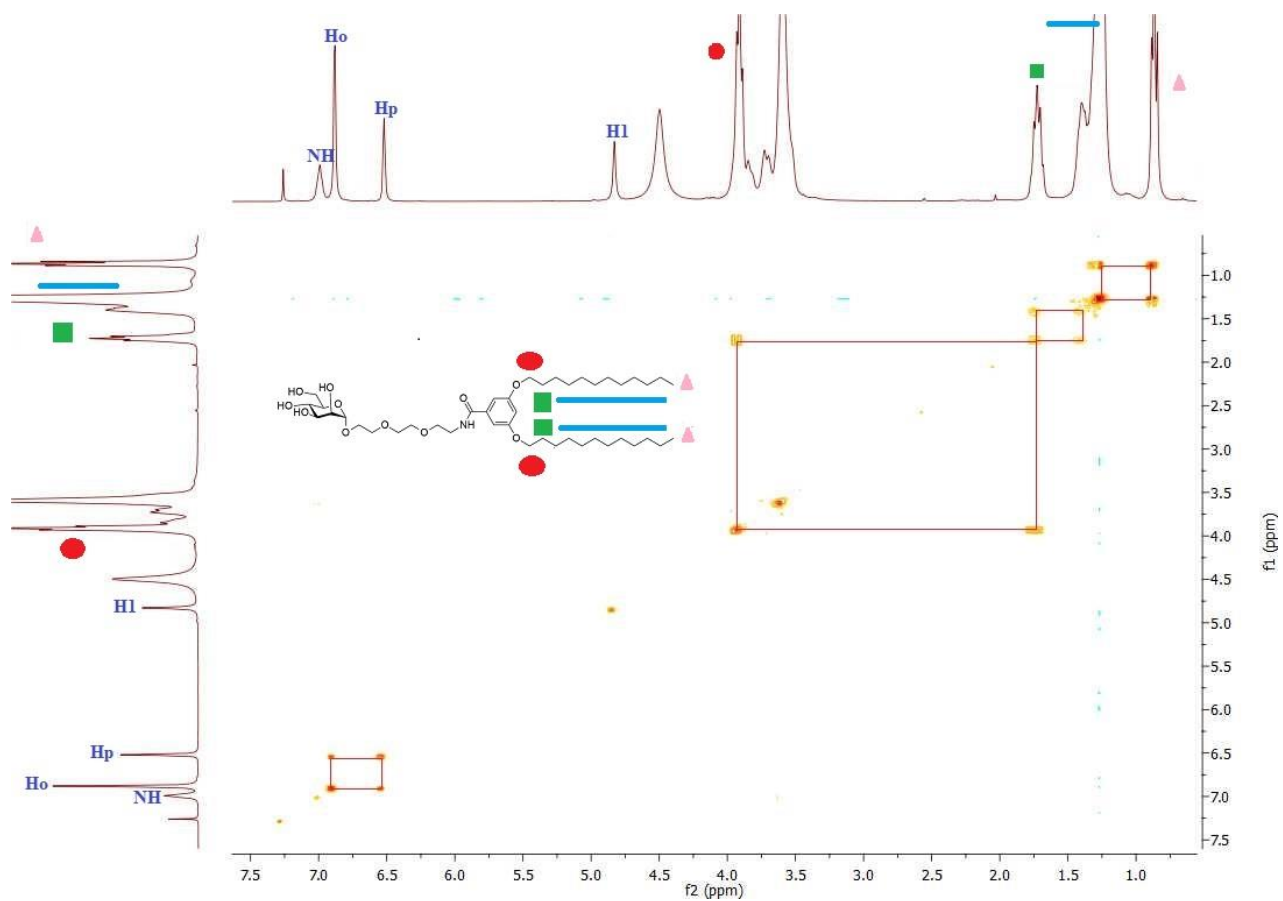

Figure 29. 2D NMR-COSY  $^1\text{H}$ - $^1\text{H}$  of compound 17

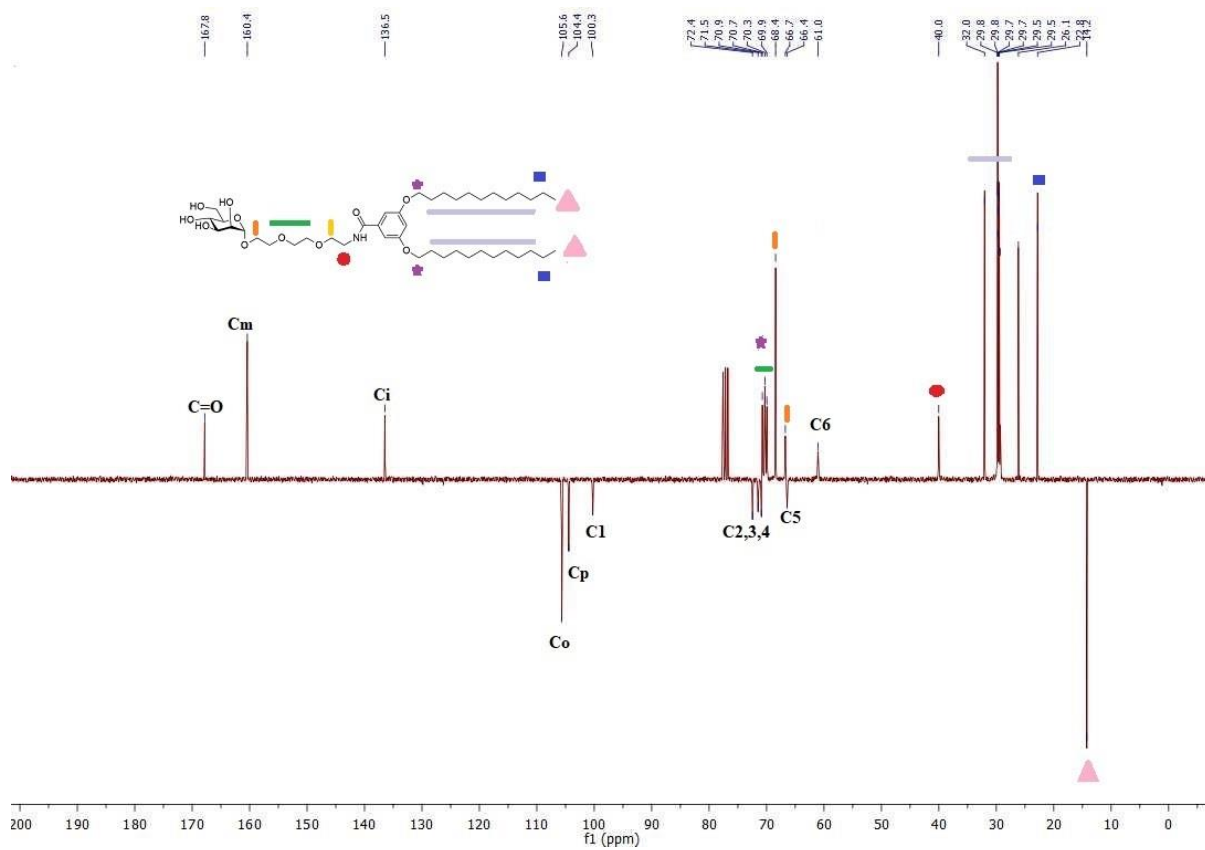

Figure 30. DEPT-135 NMR of compound 17

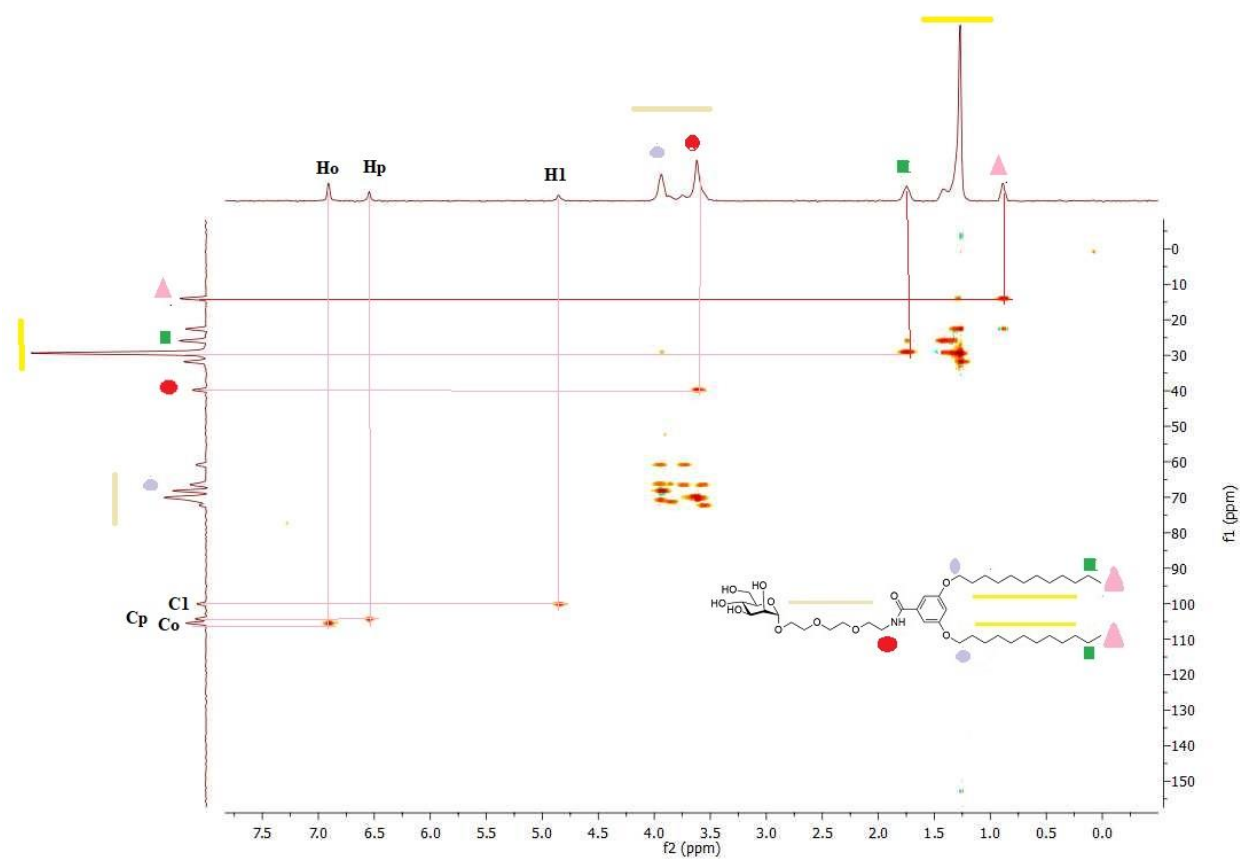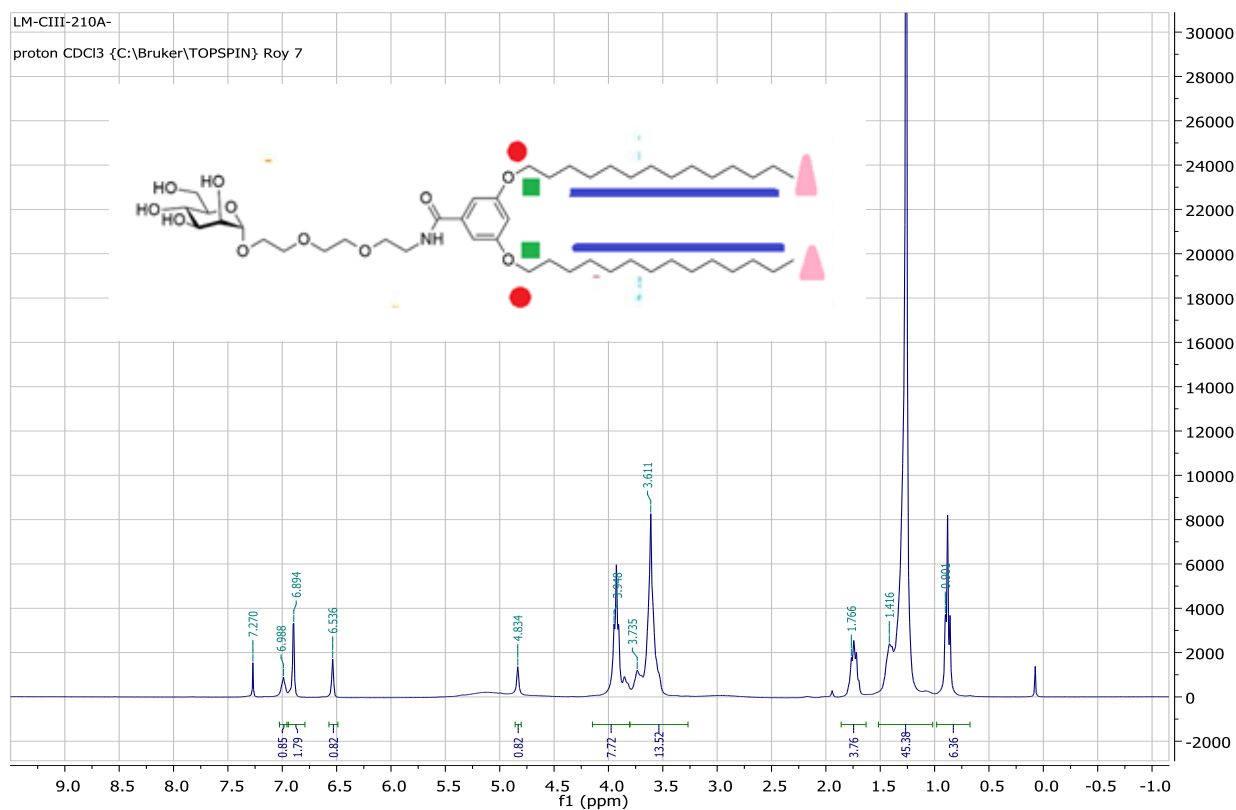

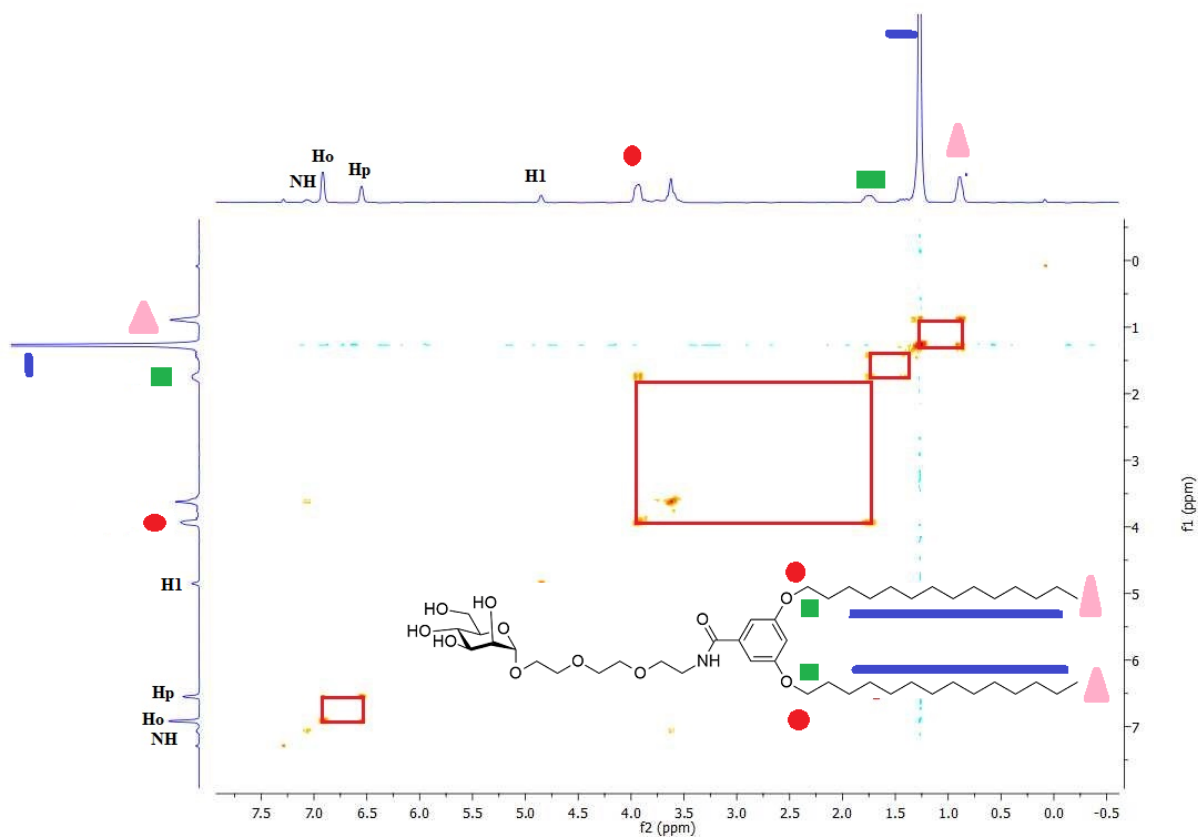

Figure 32. 2D NMR-COSY  $^1\text{H}$ - $^1\text{H}$  of compound 18

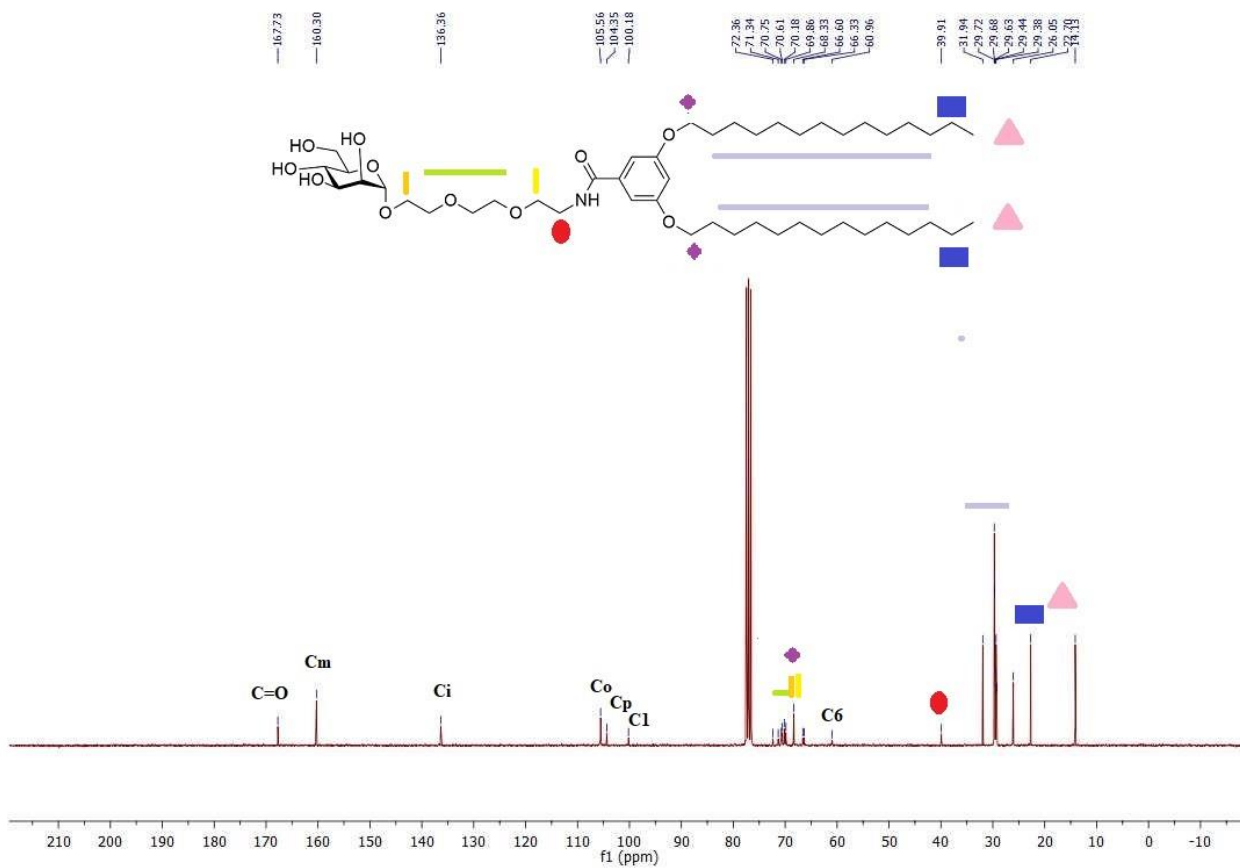

Figure 33.  $^{13}\text{C}$  NMR (300 MHz,  $\text{CDCl}_3$ ) of compound 18



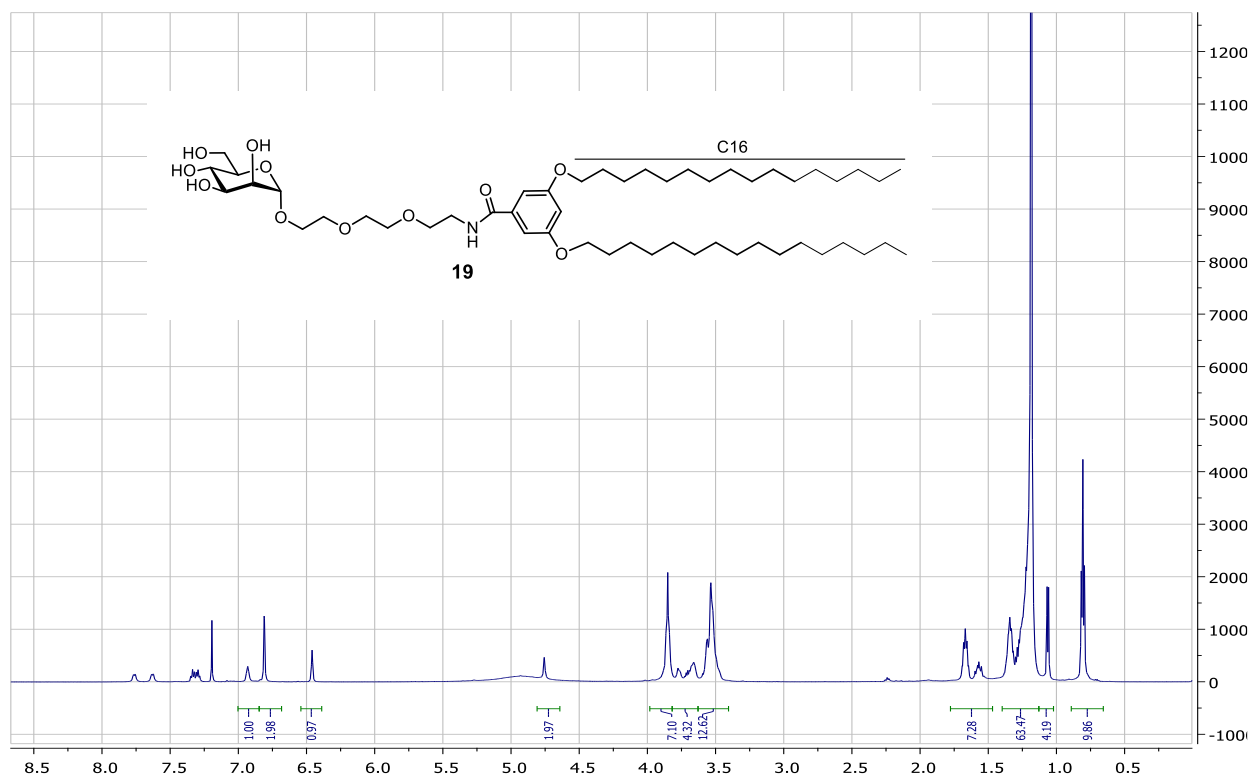

**Figure 34.**  $^1\text{H}$  NMR (600 MHz,  $\text{CDCl}_3$ ) of compound **19**

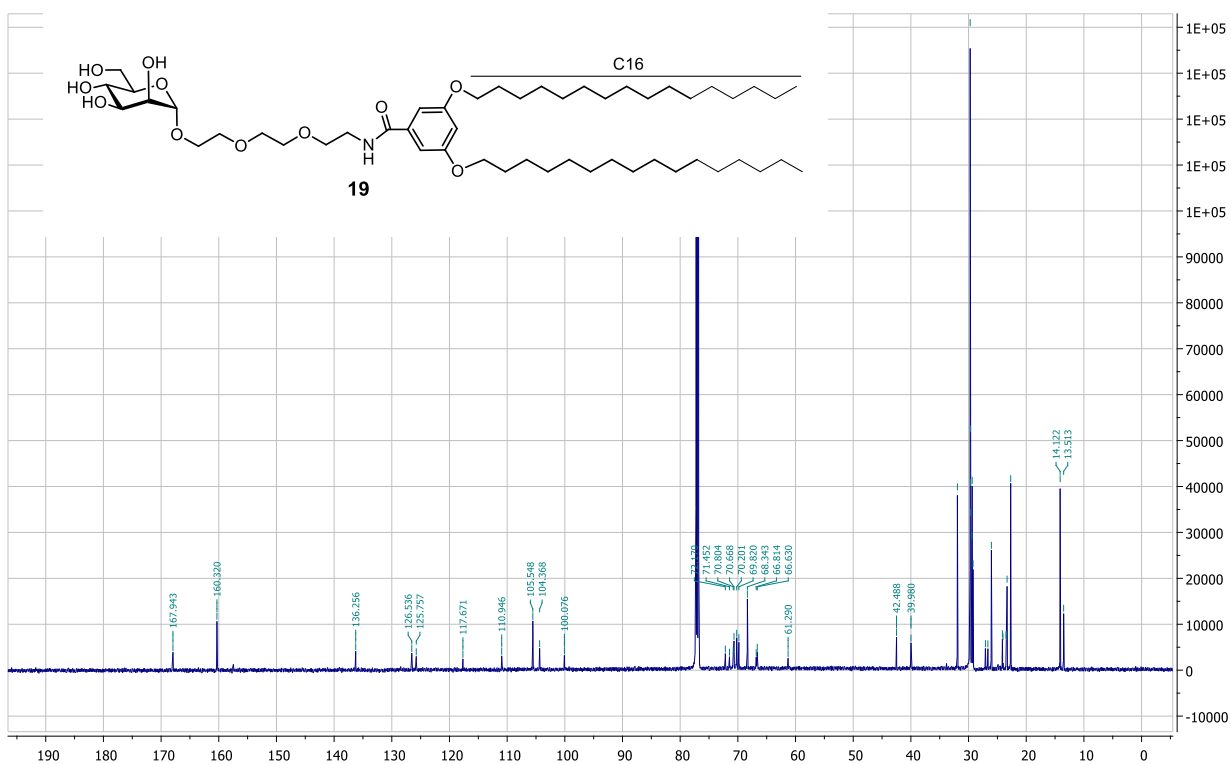

**Figure 35.**  $^{13}\text{C}$  NMR (75 MHz,  $\text{CDCl}_3$ ) of compound **19**

### Critical Micelle Concentration (CMC):

CMCs were determined using a Malvern Zetasizer Ultra (MAL1301351) (Malvern Instruments Limited, U.K.) equipped with a 4 mW He–Ne laser operating at a wavelength of 633nm. Scattered light was detected at an angle of 173°, an optical arrangement known as non-invasive back scatter (NIBS) optic arrangement that maximizes the detection of scattered light while maintaining signal quality. Measurements were carried out in a (DTS0012) polystyrene latex cell at 25 °C. A series of solutions ranging from  $5 \times 10^{-4}$  to  $0.044 \times 10^{-5}$  mol/L was prepared from an aqueous stock solution prepared at initial concentration of 1 mg/mL of compound **17-19** in ethanol followed by 2-fold dilution in distilled water. Data processing was carried out with a computer attached to the instrument. The measurements were repeated three times in order to check their reproducibility.<sup>1</sup>

The CMC values for mannolipids **17-19** were  $1.76 \times 10^{-6}$ ,  $3.87 \times 10^{-6}$ , and  $3.86 \times 10^{-6}$  mole/L, respectively.

### References

1. Önder Topel, Burçin Acar Çakır, Leyla Budama, Numan Hoda. Determination of critical micelle concentration of polybutadiene-block-poly(ethyleneoxide) diblock copolymer by fluorescence spectroscopy and dynamic light scattering. *J. Molec. Liq.*, **2013**, 177, 40–43.

**Table 1.** Scattered intensity (kcps) as a function of mannolipid **17** (C12) concentration (mol/L).

| Entry     | Concentration (mol/L)                    | Concentration (mol/L) $\times 10^{-5}$ | Intensity per kcps |
|-----------|------------------------------------------|----------------------------------------|--------------------|
| 1.        | $0.044 \times 10^{-5}$                   | 0.044                                  | 4.83               |
| 2.        | $0.088 \times 10^{-5}$                   | 0.088                                  | 4.84               |
| 3.        | $0.098 \times 10^{-5}$                   | 0.098                                  | 4.84               |
| 4.        | $0.110 \times 10^{-5}$                   | 0.011                                  | 4.83               |
| 5.        | $0.126 \times 10^{-5}$                   | 0.126                                  | 4.84               |
| 6.        | $0.147 \times 10^{-5}$                   | 0.147                                  | 4.84               |
| <b>7.</b> | <b><math>0.176 \times 10^{-5}</math></b> | <b>0.176</b>                           | <b>4.91</b>        |
| 8.        | $0.220 \times 10^{-5}$                   | 0.220                                  | 5.11               |
| 9.        | $0.441 \times 10^{-5}$                   | 0.441                                  | 8.43               |
| 10.       | $2.23 \times 10^{-5}$                    | 2.23                                   | 35.7               |
| 11.       | $0.455 \times 10^{-4}$                   | 4.55                                   | 73.1               |
| 12.       | $0.945 \times 10^{-4}$                   | 9.45                                   | 88.8               |
| 13.       | $1.47 \times 10^{-4}$                    | 14.7                                   | 119.3              |
| 14.       | $2.04 \times 10^{-4}$                    | 20.4                                   | 131.1              |
| 15.       | $2.65 \times 10^{-4}$                    | 26.5                                   | 143.6              |
| 16.       | $3.32 \times 10^{-4}$                    | 33.2                                   | 159.0              |
| 17.       | $4.06 \times 10^{-4}$                    | 40.6                                   | 171.1              |
| 18.       | $4.86 \times 10^{-4}$                    | 48.6                                   | 207.3              |
| 19.       | $5.74 \times 10^{-4}$                    | 57.4                                   | 219.0              |

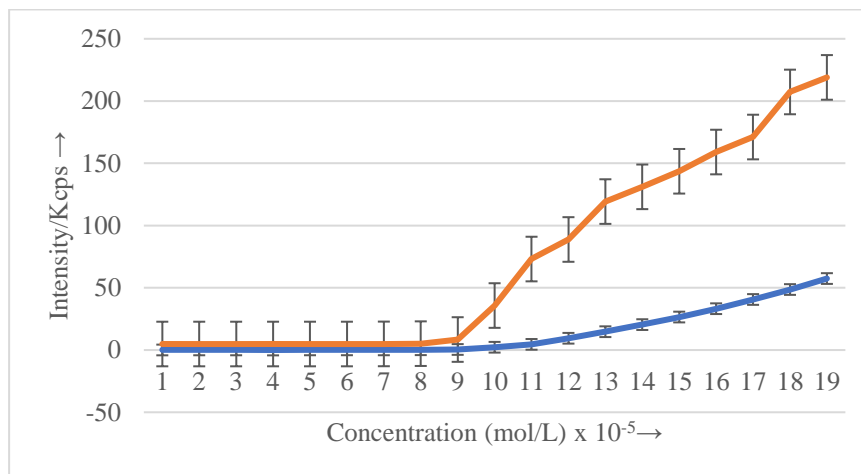

**Table 2.** Scattered intensity (kcps) as a function of mannolipid **18** (C14) concentration (mol/L).

| Entry     | Concentration (mol/L)          | Concentration (mol/L) x 10 <sup>-5</sup> | Intensity per kcps |
|-----------|--------------------------------|------------------------------------------|--------------------|
| 1.        | 0.0387 x 10 <sup>-5</sup>      | 0.0387                                   | 5.33               |
| 2.        | 0.0774 x 10 <sup>-5</sup>      | 0.0774                                   | 5.34               |
| 3.        | 0.0860 x 10 <sup>-5</sup>      | 0.0860                                   | 5.35               |
| 4.        | 0.0968 x 10 <sup>-5</sup>      | 0.0968                                   | 5.33               |
| 5.        | 0.11 0 x 10 <sup>-5</sup>      | 0.110                                    | 5.34               |
| 6.        | 0.129 x 10 <sup>-5</sup>       | 0.129                                    | 5.34               |
| 7.        | 0.154 x 10 <sup>-5</sup>       | 0.154                                    | 5.33               |
| 8.        | 0.193 x 10 <sup>-5</sup>       | 0.193                                    | 5.35               |
| <b>9.</b> | <b>0.387 x 10<sup>-5</sup></b> | <b>0.387</b>                             | <b>7.37</b>        |
| 10.       | 1.95 x 10 <sup>-5</sup>        | 1.95                                     | 35.6               |
| 11.       | 0.400 x 10 <sup>-4</sup>       | 4.00                                     | 50.6               |
| 12.       | 0.829 x 10 <sup>-4</sup>       | 8.29                                     | 69.7               |
| 13.       | 1.29 x 10 <sup>-4</sup>        | 12.9                                     | 115.8              |
| 14.       | 1.79 x 10 <sup>-4</sup>        | 17.9                                     | 140.7              |
| 15.       | 2.22 x 10 <sup>-4</sup>        | 22.2                                     | 164.7              |
| 16.       | 2.92 x 10 <sup>-4</sup>        | 29.2                                     | 206.4              |
| 17.       | 3.56 x 10 <sup>-4</sup>        | 35.6                                     | 285.1              |
| 18.       | 4.24 x 10 <sup>-4</sup>        | 42.4                                     | 300.5              |
| 19.       | 5.04 x 10 <sup>-4</sup>        | 50.4                                     | 317.3              |

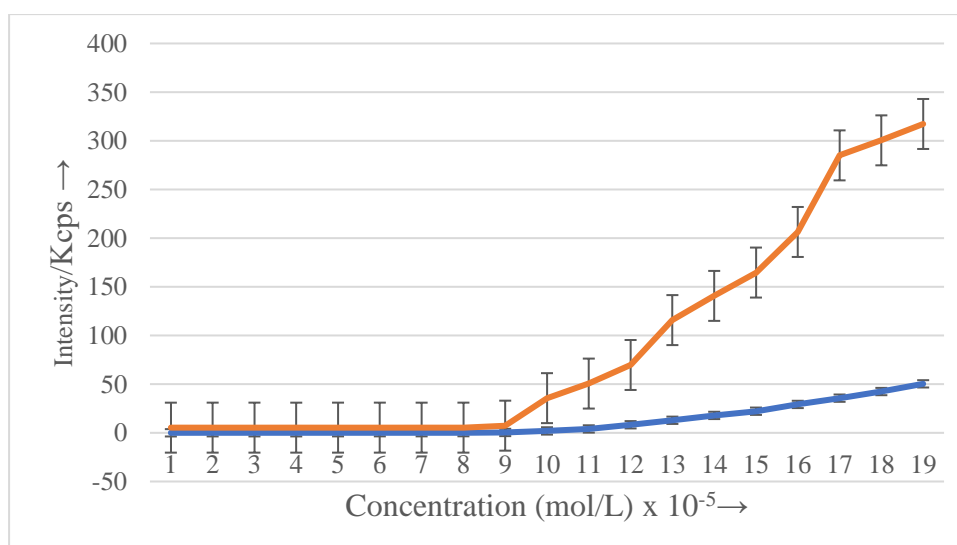

**Table 3.** Scattered intensity (kcps) as a function of mannolipid **19** (C16) concentration (mol/L).

| Entry     | Concentration (mol/L)          | Concentration (mol/L) x 10 <sup>-5</sup> | Intensity per kcps |
|-----------|--------------------------------|------------------------------------------|--------------------|
| 1.        | 0.0386 x 10 <sup>-5</sup>      | 0.0386                                   | 5.54               |
| 2.        | 0.0772 x 10 <sup>-5</sup>      | 0.0772                                   | 5.55               |
| 3.        | 0.0857 x 10 <sup>-5</sup>      | 0.0857                                   | 5.55               |
| 4.        | 0.0965 x 10 <sup>-5</sup>      | 0.0965                                   | 5.55               |
| 5.        | 0.1102 x 10 <sup>-5</sup>      | 0.1102                                   | 5.55               |
| 6.        | 0.128 x 10 <sup>-5</sup>       | 0.128                                    | 5.56               |
| 7.        | 0.154 x 10 <sup>-5</sup>       | 0.154                                    | 5.57               |
| 8.        | 0.193 x 10 <sup>-5</sup>       | 0.193                                    | 5.57               |
| <b>9.</b> | <b>0.386 x 10<sup>-5</sup></b> | <b>0.386</b>                             | <b>7.93</b>        |
| 10.       | 1.96 x 10 <sup>-5</sup>        | 1.96                                     | 34.6               |
| 11.       | 0.400 x 10 <sup>-4</sup>       | 4.00                                     | 51.6               |
| 12.       | 0.826 x 10 <sup>-4</sup>       | 8.26                                     | 70.7               |
| 13.       | 1.29 x 10 <sup>-4</sup>        | 12.9                                     | 117.9              |
| 14.       | 1.78 x 10 <sup>-4</sup>        | 17.8                                     | 151.0              |
| 15.       | 2.32 x 10 <sup>-4</sup>        | 23.2                                     | 168.6              |
| 16.       | 2.91 x 10 <sup>-4</sup>        | 29.1                                     | 209.3              |
| 17.       | 3.55 x 10 <sup>-4</sup>        | 35.5                                     | 265.2              |
| 18.       | 4.25 x 10 <sup>-4</sup>        | 42.5                                     | 298.4              |
| 19.       | 5.02 x 10 <sup>-4</sup>        | 50.2                                     | 328.4              |

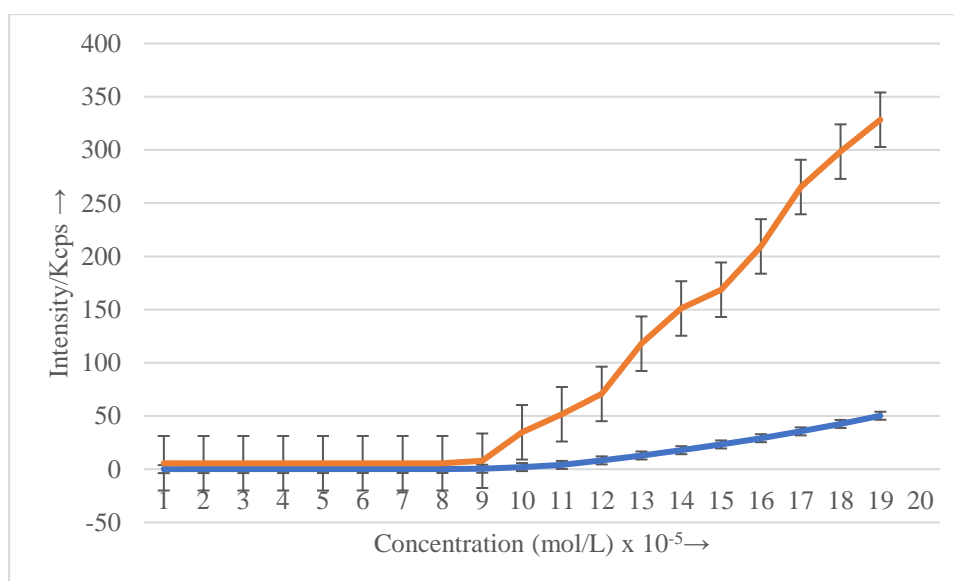

Supplement: d4ma01007h1.pdf [file d4ma01007h1.pdf]
